# Supplementary material for: Lineariifolianoids A–D, rare unsymmetrical sesquiterpenoid dimers comprised of xanthane and guaiane framework units from Inula lineariifolia
Source: Royal Society of Chemistry journal article supplement (doi:10.1039/c2ra01014c), 2012-01-01

# Electronic Supplementary Information

**Lineariifolians A–D, rare unsymmetrical sesquiterpenoid dimers comprised by xanthane and guaiane framework units from *Inula lineariifolia***

Jiang-Jiang Qin,<sup>a,c</sup> Ying Huang,<sup>a</sup> Dan Wang,<sup>b</sup> Xiang-Rong Cheng,<sup>a</sup>

Qi Zeng,<sup>a</sup> Shou-De Zhang,<sup>a</sup> Zhen-lin Hu,<sup>b</sup> Hui-Zi Jin,<sup>\*a</sup> and

Wei-Dong Zhang<sup>\*a,b</sup>

<sup>a</sup> School of Pharmacy, Shanghai Jiao Tong University, Dongchuan Rd 800, Shanghai 200240, PR China;

<sup>b</sup> School of Pharmacy, Second Military Medical University, Shanghai 200433, PR China.

<sup>c</sup> Department of Pharmaceutical Sciences, School of Pharmacy, Texas Tech University Health Sciences Center, Amarillo, TX 79106, USA

\* Corresponding author

E-mail addresses: [wdzhangy@hotmail.com](mailto:wdzhangy@hotmail.com); [kimhz@sjtu.edu.cn](mailto:kimhz@sjtu.edu.cn).

Fax: +86 (0)21 8187 1244; Tel: +86 (0)21 8187 1244

## Contents

### Experimental procedures

#### Crystallographic data of Lineariifolianoid A (1) and Japonicone A (5)

#### TNF- $\alpha$ -mediated L929 cytotoxicity assay

**Table S1.**  $^1\text{H}$  (400 MHz) and  $^{13}\text{C}$  (100 MHz) NMR data for **1–4** in  $\text{CDCl}_3$

**Fig. S1** Key NOESY correlations of lineariifolianoid A (**1**).

**Fig. S2** Key NOESY correlations of lineariifolianoid B (**2**).

**Fig. S3** Key  $^1\text{H}$ – $^1\text{H}$  COSY and HMBC correlations of lineariifolianoid B (**2**).

**Fig. S4** Key  $^1\text{H}$ – $^1\text{H}$  COSY and HMBC correlations of lineariifolianoid C (**3**).

**Fig. S5** Key  $^1\text{H}$ – $^1\text{H}$  COSY and HMBC correlations of lineariifolianoid D (**4**).

**Fig. S6** Different concentrations of lineariifolianoids A–D (**1–4**) were premixed with a fixed concentration of TNF- $\alpha$  (10 ng/ml) and were added to L929 cells together with 1  $\mu\text{g}/\text{ml}$  of Actinomycin D. After 16 h of incubation, Cell viability was examined under microscope and the inhibition of cytotoxicity was measured by MTT method. The results of MTT assay showing that lineariifolianoid D (**4**) inhibited TNF- $\alpha$ -mediated cytotoxicity dose-dependently from 2.5 to 10  $\mu\text{M}$ .

**Fig. S7**  $^1\text{H}$  NMR spectrum of lineariifolianoid A (**1**) recorded at 400 MHz in  $\text{CDCl}_3$ .

**Fig. S8**  $^{13}\text{C}$  NMR spectrum of lineariifolianoid A (**1**) recorded at 100 MHz in  $\text{CDCl}_3$ .

**Fig. S9** DEPT NMR spectrum of lineariifolianoid A (**1**) recorded at 100 MHz in  $\text{CDCl}_3$ .

**Fig. S10** HSQC spectrum of lineariifolianoid A (**1**) recorded in  $\text{CDCl}_3$ .

**Fig. S11**  $^1\text{H}$ – $^1\text{H}$  COSY spectrum of lineariifolianoid A (**1**) recorded in  $\text{CDCl}_3$ .

**Fig. S12** HMBC spectrum of lineariifolianoid A (**1**) recorded in CDCl<sub>3</sub>.

**Fig. S13** NOESY spectrum of lineariifolianoid A (**1**) recorded in CDCl<sub>3</sub>.

**Fig. S14** <sup>1</sup>H NMR spectrum of lineariifolianoid B (**2**) recorded at 400 MHz in CDCl<sub>3</sub>.

**Fig. S15** <sup>13</sup>C NMR spectrum of lineariifolianoid B (**2**) recorded at 400 MHz in CDCl<sub>3</sub>.

**Fig. S16** DEPT NMR spectrum of lineariifolianoid B (**2**) recorded at 400 MHz in CDCl<sub>3</sub>.

**Fig. S17** HSQC spectrum of lineariifolianoid B (**2**) recorded in CDCl<sub>3</sub>.

**Fig. S18** <sup>1</sup>H–<sup>1</sup>H COSY spectrum of lineariifolianoid B (**2**) recorded in CDCl<sub>3</sub>.

**Fig. S19** HMBC spectrum of lineariifolianoid B (**2**) recorded in CDCl<sub>3</sub>.

**Fig. S20** NOESY spectrum of lineariifolianoid B (**2**) recorded in CDCl<sub>3</sub>.

**Fig. S21** <sup>1</sup>H NMR spectrum of lineariifolianoid C (**3**) recorded at 400 MHz in CDCl<sub>3</sub>.

**Fig. S22** <sup>13</sup>C NMR spectrum of lineariifolianoid C (**3**) recorded at 400 MHz in CDCl<sub>3</sub>.

**Fig. S23** DEPT NMR spectrum of lineariifolianoid C (**3**) recorded at 400 MHz in CDCl<sub>3</sub>.

**Fig. S24** HSQC spectrum of lineariifolianoid C (**3**) recorded in CDCl<sub>3</sub>.

**Fig. S25** <sup>1</sup>H–<sup>1</sup>H COSY spectrum of lineariifolianoid C (**3**) recorded in CDCl<sub>3</sub>.

**Fig. S26** HMBC spectrum of lineariifolianoid C (**3**) recorded in CDCl<sub>3</sub>.

**Fig. S27** NOESY spectrum of lineariifolianoid C (**3**) recorded in CDCl<sub>3</sub>.

**Fig. S28** <sup>1</sup>H NMR spectrum of lineariifolianoid D (**4**) recorded at 400 MHz in CDCl<sub>3</sub>.

**Fig. S29** <sup>13</sup>C NMR spectrum of lineariifolianoid D (**4**) recorded at 400 MHz in CDCl<sub>3</sub>.

**Fig. S30** DEPT NMR spectrum of lineariifolianoid D (**4**) recorded at 400 MHz in

CDCl<sub>3</sub>.

**Fig. S31** HSQC spectrum of lineariifolianoid D (**4**) recorded in CDCl<sub>3</sub>.

**Fig. S32** <sup>1</sup>H–<sup>1</sup>H COSY spectrum of lineariifolianoid D (**4**) recorded in CDCl<sub>3</sub>.

**Fig. S33** HMBC spectrum of lineariifolianoid D (**4**) recorded in CDCl<sub>3</sub>.

**Fig. S34** NOESY spectrum of lineariifolianoid D (**4**) recorded in CDCl<sub>3</sub>.

## Experimental procedures

**General procedures:** 1D and 2D NMR spectra were taken on a Bruker Avance-400 or Avance-500 spectrometers in CDCl<sub>3</sub> or CD<sub>3</sub>OD with TMS as internal standard. Optical rotations were obtained with a JASCO P-2000 polarimeter. IR spectra were recorded on a Bruker FTIR Vector 22 spectrometer using KBr pellets. ESIMS spectra were recorded on an Agilent-1100-LC/MSD-Trap XCT spectrometer, whereas HRESIMS were performed using a Waters Q-TOF micro mass spectrometer. Column chromatography (CC) was performed on silica gel (100-200, 200-300 mesh, Yantai, China), and Sephadex LH-20 (GE Healthcare Bio-Sciences AB, Sweden). A preparative column (Shimadzu PRC-ODS EV0233) was used for preparative HPLC (Shimadzu LC-6AD).

**Plant material:** The aerial parts of *I. lineariifolia* were collected in Changfeng County, Anhui Province, PR China, in July 2007, and identified by Prof. Shou-Jin Liu, Anhui University of Traditional Chinese Medicine. A voucher specimen (No.XX20070701) was deposited at School of Pharmacy, Shanghai Jiao Tong University.

**Extraction and isolation:** The air-dried aerial parts of *I. lineariifolia* (60.0 kg) were powdered and extracted with 95% ethanol three times each for 24 h at room temperature. The solvent was removed in vacuo to afford a crude EtOH extract, which was suspended in H<sub>2</sub>O and then partitioned successively with petroleum ether (PE), CH<sub>2</sub>Cl<sub>2</sub>, EtOAc, and *n*-BuOH, respectively. 150.0 g of the CH<sub>2</sub>Cl<sub>2</sub> extract was subjected to silica gel column eluted with gradient CH<sub>2</sub>Cl<sub>2</sub>/MeOH (1:0 to 1:1) to give 10 fractions (*Fr.1-Fr.10*) based on TLC analysis. *Fr.2* (33.0 g) was chromatographed on silica gel eluted with a gradient of PE/EtOAc (20:1 to 1:1) to afford five subfractions (*Fr.2-1-Fr.2-5*). Compound **1** (1.6 g) was obtained after CC over Sephadex LH-20 (MeOH) from *Fr.2-4*. *Fr.4* (15.5 g) was subjected to a silica gel CC eluted with gradient PE/EtOAc (5:1 to 1:1) to give eleven subfractions (*Fr.4-1-Fr.4-11*). *Fr.4-9* was subjected to CC over Sephadex LH-20 (MeOH) followed

by preparative HPLC (MeOH/H<sub>2</sub>O, 65:35) to yield **2** (5.5 mg). *Fr.4-10* was chromatographed on silica gel eluted with gradient CH<sub>2</sub>Cl<sub>2</sub>/MeOH (1:0 to 1:1) to give five subfractions (*Fr.4-10a–Fr.4-10e*). Compound **3** (5.0 mg) was obtained after preparative HPLC (MeOH/H<sub>2</sub>O, 60:40) from *Fr.4-10d*. *Fr.4-10e* was subjected to preparative HPLC (MeOH/H<sub>2</sub>O, 60:40) to give **4** (11.0 mg).

**Lineariifolianoid A (1)** Colorless monoclinic crystals (MeOH); mp 148–151 °C;  $[\alpha]_D^{20} +81.7$  (*c* 0.10, MeOH); IR (KBr)  $\nu_{\max}$  3437, 2938, 1751, 1637 cm<sup>-1</sup>; <sup>1</sup>H and <sup>13</sup>C NMR data, see Table 1; ESIMS (positive) *m/z* 617 [M + Na]<sup>+</sup>, HRESIMS (positive) *m/z* 617.2746 [M + Na]<sup>+</sup> (calcd for C<sub>34</sub>H<sub>42</sub>O<sub>9</sub>Na, 617.2721).

**Lineariifolianoid B (2)** Colorless gum;  $[\alpha]_D^{20} +122.5$  (*c* 0.20, MeOH); IR (KBr)  $\nu_{\max}$  3450, 2935, 1742, 1636 cm<sup>-1</sup>; <sup>1</sup>H and <sup>13</sup>C NMR data, see Table 1; ESIMS (positive) *m/z* 591 [M + Na]<sup>+</sup>, HRESIMS (positive) *m/z* 591.2566 [M + Na]<sup>+</sup> (calcd for C<sub>32</sub>H<sub>40</sub>O<sub>9</sub>Na, 591.2565).

**Lineariifolianoid C (3)** Colorless gum;  $[\alpha]_D^{20} +198.0$  (*c* 0.10, MeOH); IR (KBr)  $\nu_{\max}$  3441, 2926, 1744, 1638 cm<sup>-1</sup>; <sup>1</sup>H and <sup>13</sup>C NMR data, see Table 1; ESIMS (positive) *m/z* 591 [M + Na]<sup>+</sup>, HRESIMS (positive) *m/z* 591.2587 [M + Na]<sup>+</sup> (calcd for C<sub>32</sub>H<sub>40</sub>O<sub>9</sub>Na, 591.2565).

**Lineariifolianoid D (4)** Colorless gum;  $[\alpha]_D^{20} +63.3$  (*c* 0.20, MeOH); IR (KBr)  $\nu_{\max}$  3418, 2936, 1763, 1724, 1634 cm<sup>-1</sup>; <sup>1</sup>H and <sup>13</sup>C NMR data, see Table 1; ESIMS (positive) *m/z* 591 [M + Na]<sup>+</sup>, HRESIMS (positive) *m/z* 591.2576 [M + Na]<sup>+</sup> (calcd for C<sub>32</sub>H<sub>40</sub>O<sub>9</sub>Na, 591.2565).

**Japonicone A (5)** The major sesquiterpenoid dimer isolated from the aerial parts of *I. japonica*. Its structure has been elucidated in the reported literature (*Bioorg. Med. Chem. Lett.* **2009**, *19*, 710.).

## Crystallographic data of Lineariifolianoid A (1) and Japonicone A (5)

Crystallographic data of lineariifolianoid A (1) (copper radiation):  $C_{34}H_{42}O_9$ ,  $H_2O$ ,  $M = 612.69$ , Monoclinic, space group P2 (1),  $a = 10.9631$  (3) Å,  $\alpha = 90^\circ$ ;  $b = 21.0687$  (5) Å,  $\beta = 94.4040$  (10) $^\circ$ ;  $c = 14.2884$  (4) Å,  $\gamma = 90^\circ$ ;  $V = 3290.56$  (15) Å<sup>3</sup>,  $Z = 1$ ,  $D_{\text{calcd}} = 1.237$  mg/m<sup>3</sup>, crystal size  $0.342 \times 0.311 \times 0.205$  mm<sup>3</sup>. Cu K $\alpha$  ( $\lambda = 1.54178$  Å),  $F(000) = 1312$ ,  $T = 296(2)$  K. The final  $R$  values were  $R_1 = 0.0433$ , and  $wR_2 = 0.1285$ , for 11088 observed reflections [ $I > 2\sigma(I)$ ]. The absolute structure parameter was 0.04(14).

Crystallographic data of japonicone A (5) (copper radiation):  $C_{32}H_{40}O_7$ ,  $CH_3CN$ ,  $M = 577.69$ , Monoclinic, space group P2 (1),  $a = 9.50250$  (10) Å,  $\alpha = 90^\circ$ ;  $b = 9.95250$  (10) Å,  $\beta = 104.11^\circ$ ;  $c = 17.3337$  (2) Å,  $\gamma = 90^\circ$ ;  $V = 1589.82$  (3) Å<sup>3</sup>,  $Z = 2$ ,  $D_{\text{calcd}} = 1.207$  mg/m<sup>3</sup>, crystal size  $0.321 \times 0.232 \times 0.176$  mm<sup>3</sup>. Cu K $\alpha$  ( $\lambda = 1.54178$  Å),  $F(000) = 620$ ,  $T = 296(2)$  K. The final  $R$  values were  $R_1 = 0.0313$ , and  $wR_2 = 0.0948$ , for 12568 observed reflections [ $I > 2\sigma(I)$ ]. The absolute structure parameter was 0.10 (14).

Crystallographic data for **1** and **5** have been deposited at the Cambridge Crystallographic Data Centre (deposition number: CCDC 806236 and 823557, respectively). Copies of the data can be obtained, free of charge, on application to the Director, CCDC, 12 Union Road, Cambridge CB2 1EZ, UK (fax: +44 1223 336033 or e-mail: [data\\_request@ccdc.cam.ac.uk](mailto:data_request@ccdc.cam.ac.uk)).

## **TNF- $\alpha$ -mediated L929 cytotoxicity assay**

L929 cells were seeded in 96-well plates at  $2.5 \times 10^4$  cells/well and cultures overnight. TNF- $\alpha$  (10 ng/ml) was incubated with different concentrations of lineariifolians A–D (**1–4**) in culture medium at 37 °C for 30 min. After incubation, the mixtures of TNF- $\alpha$  with lineariifolians were added to the cells with 1  $\mu$ g/ml of Actinomycin D and cultured for 16 h. Cell viability was assessed by microscope examination and the MTT colorimetric assay. Percentage inhibition of cytotoxicity was calculated with the following formula:  $(OD_{\text{actinomycinD+TNF-}\alpha+\text{Comps}} - OD_{\text{actinomycinD+TNF-}\alpha}) / (OD_{\text{actinomycinD}} - OD_{\text{actinomycinD+TNF-}\alpha}) \times 100$ . Each concentration of lineariifolians was tested in triplicate.



**Table S1.**  $^1\text{H}$  (400 MHz) and  $^{13}\text{C}$  (100 MHz) NMR data for **1–4** in  $\text{CDCl}_3$

| No.         | <b>1</b>            |                               | <b>2</b>            |                               | <b>3</b>            |                               | <b>4</b>            |                               |
|-------------|---------------------|-------------------------------|---------------------|-------------------------------|---------------------|-------------------------------|---------------------|-------------------------------|
|             | $\delta_{\text{C}}$ | $\delta_{\text{H}}$ (J in Hz) |
| 1           | 152.4 s             |                               | 143.5 s             |                               | 151.7 s             |                               | 150.6 s             |                               |
| 2a          | 31.1 t              | 2.45 m                        | 30.5 t              | 2.35 m                        | 30.9 t              | 2.40 m                        | 31.4 t              | 2.46 m                        |
| 2b          |                     | 2.29 m                        |                     | 2.25 m                        |                     | 2.40 m                        |                     | 2.30 m                        |
| 3a          | 42.1 t              | 2.57 m                        | 42.0 t              | 2.55 m                        | 42.4 t              | 2.52 m                        | 42.0 t              | 2.62 m                        |
| 3b          |                     | 2.44 m                        |                     | 2.45 m                        |                     | 2.40 m                        |                     | 2.46 m                        |
| 4           | 206.9 s             |                               | 207.4 s             |                               | n.o.                |                               | 209.6 s             |                               |
| 5           | 121.3 d             | 5.73 d (8.3)                  | 132.4 d             | 5.36 s                        | 121.6 d             | 5.71 d (8.0)                  | 122.5 d             | 5.64 d (8.0)                  |
| 6           | 68.8 d              | 5.29 d (8.4)                  | 66.6 d              | 4.65 d (9.6)                  | 69.1 d              | 5.38 d (8.7)                  | 70.4 d              | 4.68 m                        |
| 7           | 49.0 d              | 2.48 m                        | 52.3 d              | 2.45 m                        | 48.3 d              | 2.95 m                        | 49.7 d              | 3.51 d (7.5)                  |
| 8           | 78.0 d              | 4.80 m                        | 78.7 d              | 4.80 m                        | 79.1 d              | 4.86 ddd (11.3,5.9,5.9)       | 81.1 d              | 4.95 m                        |
| 9a          | 38.1 t              | 2.40 m                        | 36.1 t              | 2.25 m                        | 38.1 t              | 2.40 m                        | 37.1 t              | 2.46 m                        |
| 9b          |                     | 2.22 m                        |                     | 1.90 m                        |                     | 2.20 m                        |                     | 2.20 m                        |
| 10          | 31.9 d              | 2.37 m                        | 32.0 d              | 2.35 m                        | 31.8 d              | 2.40 m                        | 31.9 d              | 2.40 m                        |
| 11          | 54.4 s              |                               | 55.8 s              |                               | 54.8 s              |                               | 57.6 s              |                               |
| 12          | 178.0 s             |                               | 180.1 s             |                               | 180.7 s             |                               | 185.6 s             |                               |
| 13a         | 36.0 t              | 1.80 m                        | 33.3 t              | 3.57 d (12.4)                 | 32.7 t              | 2.40 m                        | 35.3 t              | 2.46 m                        |
| 13b         |                     | 1.80 m                        |                     | 1.66 d (12.8)                 |                     | 1.50 d (12.1)                 |                     | 1.56 d (13.6)                 |
| 14          | 21.5 q              | 1.18 d (6.6)                  | 21.1 q              | 1.16 d (7.0)                  | 21.4 q              | 1.18 d (6.7)                  | 21.4 q              | 1.13 d (6.8)                  |
| 15          | 29.9 q              | 2.13 s                        | 29.9 q              | 2.14 s                        | 29.8 q              | 2.14 ovl                      | 29.8 q              | 2.11 s                        |
| 1'          | 62.4 s              |                               | 60.0 s              |                               | 60.7 s              |                               | 72.3 s              |                               |
| 2'          | 82.1 d              | 4.57 br s                     | 80.8 d              | 4.57 s                        | 82.6 d              | 3.76 s                        | 85.6 d              | 3.62 d (12.2)                 |
| 3'          | 57.0 d              | 2.81 m                        | 59.1 d              | 2.85 s                        | 60.3 d              | 2.60 s                        | 52.7 d              | 2.58 s                        |
| 4'          | 133.8 s             |                               | 137.4 s             |                               | 138.4 s             |                               | 148.2 s             |                               |
| 5'          | 136.6 s             |                               | 139.7 s             |                               | 139.9 s             |                               | 139.1 s             |                               |
| 6' $\alpha$ | 26.0 t              | 3.02 br d (15.9)              | 69.7 d              | 4.73 d (6.8)                  | 69.9 d              | 4.71 d (7.0)                  | 68.4 d              | 4.69 m                        |
| 6' $\beta$  |                     | 2.05 m                        |                     |                               |                     |                               |                     |                               |
| 7'          | 45.3 d              | 2.78 m                        | 47.9 d              | 3.22 m                        | 48.1 d              | 3.21 m                        | 47.9 d              | 3.18 m                        |
| 8'          | 82.4 d              | 4.18 m                        | 76.3 d              | 4.15 dd (17.6, 9.7)           | 76.4 d              | 4.12 dd (17.6, 9.7)           | 75.6 d              | 4.07 dd (17.8, 9.7)           |
| 9' $\alpha$ | 36.0 t              | 2.31 m                        | 38.2 t              | 2.20 m                        | 38.5 t              | 2.20 m                        | 40.5 t              | 2.46 m                        |
| 9' $\beta$  |                     | 1.90 m                        |                     | 1.90 m                        |                     | 1.90 m                        |                     | 1.88 m                        |
| 10'         | 29.7 d              | 2.05 m                        | 29.4 d              | 2.57 m                        | 29.7 d              | 2.58 m                        | 30.0 d              | 2.75 m                        |
| 11'         | 139.4 s             |                               | 139.5 s             |                               | 139.7 s             |                               | 140.0 s             |                               |
| 12'         | 170.1 s             |                               | 169.9 s             |                               | 170.0 s             |                               | 169.6 s             |                               |
| 13'a        | 119.5 t             | 6.25 d (3.2)                  | 121.0 t             | 6.26 d (3.0)                  | 121.7 t             | 6.26 d (3.4)                  | 120.7 t             | 6.25 d (3.4)                  |
| 13'b        |                     | 5.52 d (3.0)                  |                     | 5.95 br s                     |                     | 5.98 br s                     |                     | 5.88 d (2.9)                  |
| 14'         | 17.0 q              | 1.03 d (7.2)                  | 16.6 q              | 1.07 d (6.9)                  | 17.4 q              | 1.18 d (6.7)                  | 17.3 q              | 1.31 d (6.7)                  |
| 15'         | 14.4 q              | 1.66 s                        | 13.7 q              | 1.71 s                        | 14.1 q              | 1.69 s                        | 12.9 q              | 1.81 s                        |
| 6-OAc       | 169.9 s             |                               |                     |                               | 170.1 s             |                               | 170.2 s             |                               |
| 2'-OH       |                     |                               |                     |                               |                     |                               |                     | 5.51 d (12.6)                 |
| 2'-OAc      | 170.0 s             |                               | 170.0               |                               |                     |                               |                     |                               |

Ovl: overlapped; n.o.: not observed.

**Fig. S1** Key NOESY correlations of lineariifolianoid A (1).

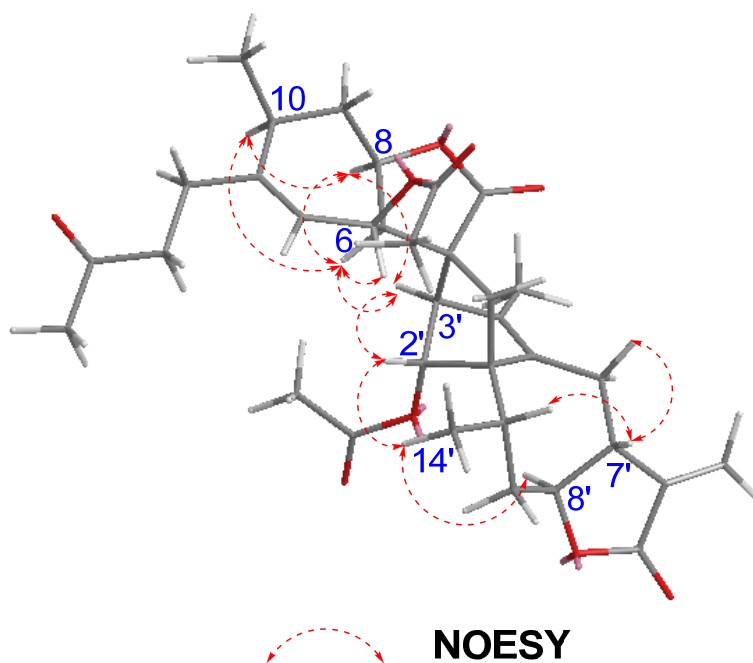

**Fig. S2** Key NOESY correlations of lineariifolianoid B (2).

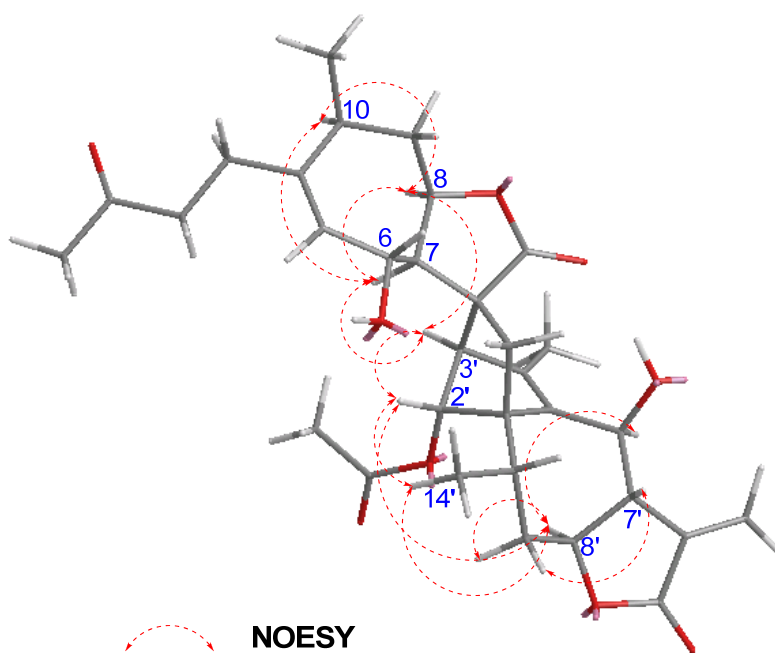

**Fig. S3** Key  $^1\text{H}$ - $^1\text{H}$  COSY and HMBC correlations of lineariifolianoid B (**2**).

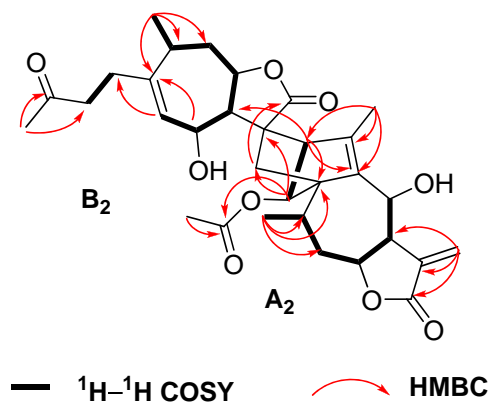

**Fig. S4** Key  $^1\text{H}$ - $^1\text{H}$  COSY and HMBC correlations of lineariifolianoid C (**3**).

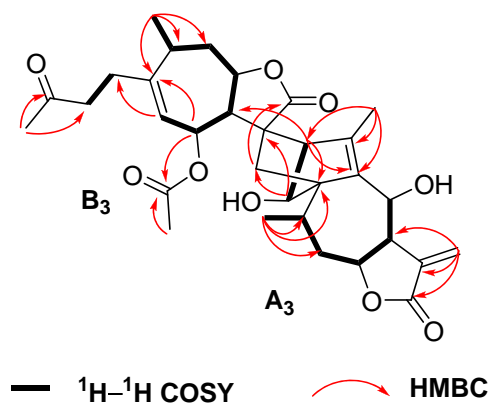

**Fig. S5** Key  $^1\text{H}$ - $^1\text{H}$  COSY and HMBC correlations of lineariifolianoid D (**4**).

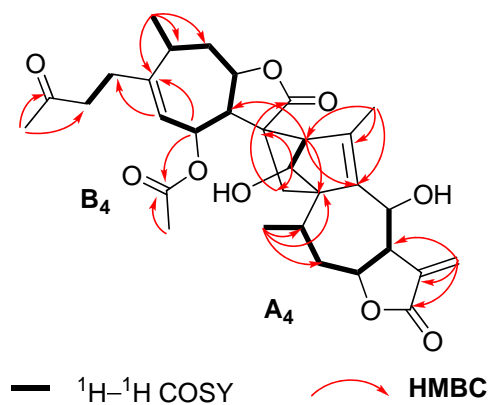

**Fig. S6** Different concentrations of lineariifolianoids A–D (1–4) were premixed with a fixed concentration of TNF- $\alpha$  (10 ng/ml) and were added to L929 cells together with 1  $\mu$ g/ml of Actinomycin D. After 16 h of incubation, Cell viability was examined under microscope and the inhibition of cytotoxicity was measured by MTT method. The results of MTT assay showing that lineariifolianoid D (4) inhibited TNF- $\alpha$ -mediated cytotoxicity dose-dependently from 2.5 to 10  $\mu$ M.

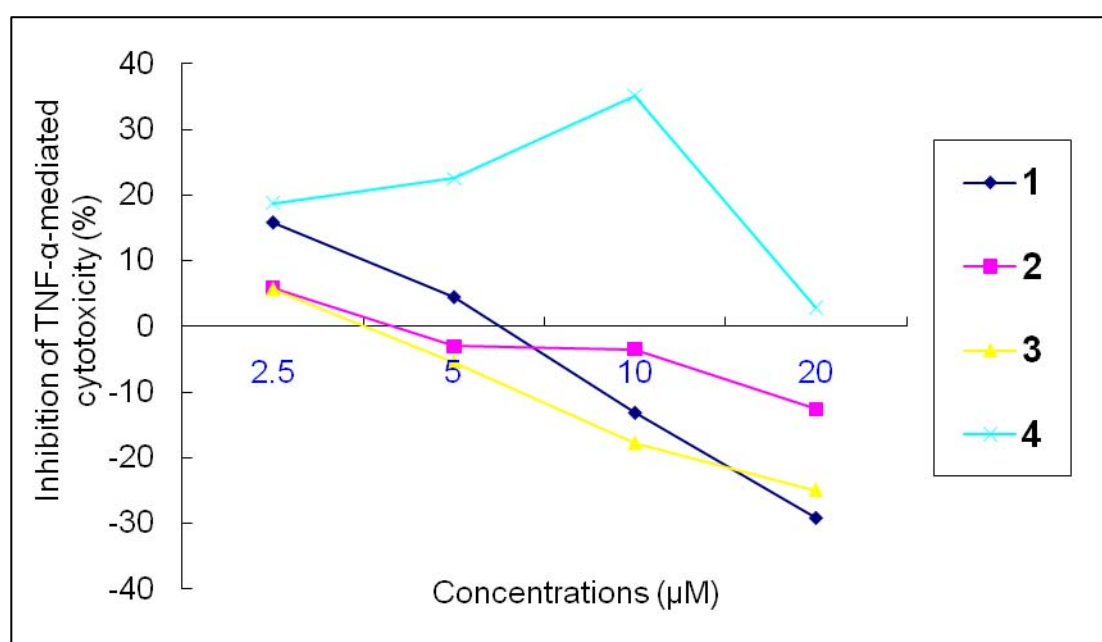

**Fig. S7**  $^1\text{H}$  NMR spectrum of lineariifolianoid A (**1**) recorded at 400 MHz in  $\text{CDCl}_3$ .

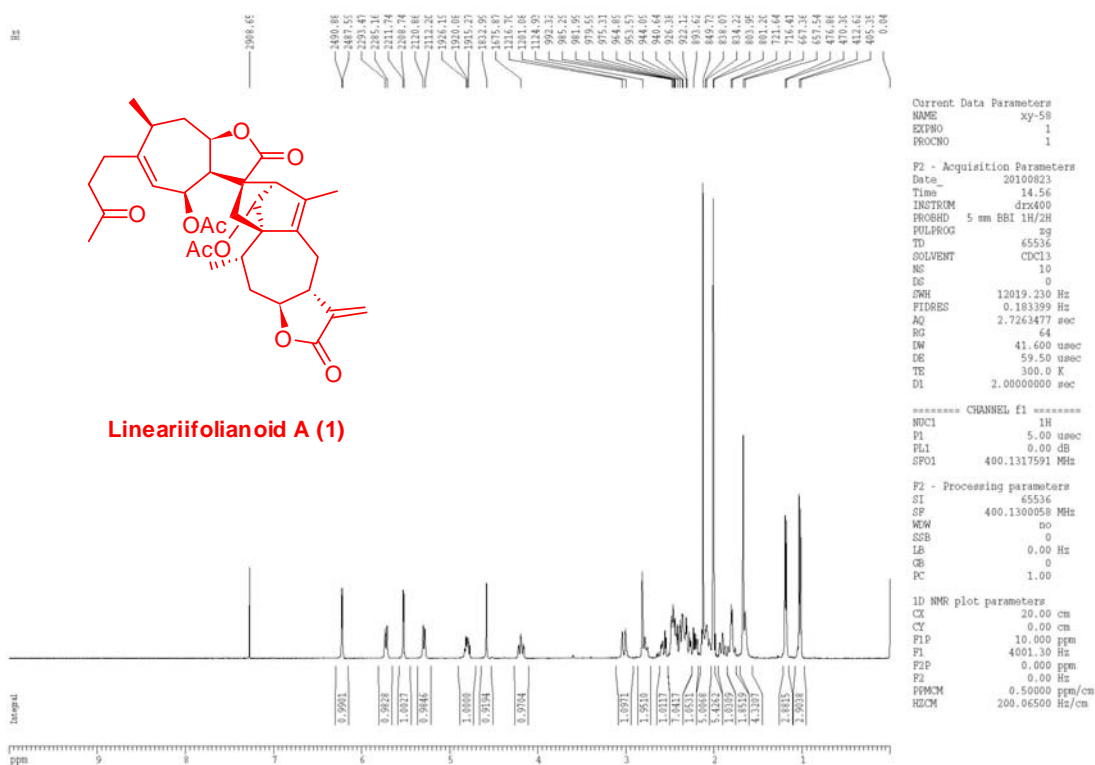

**Fig. S8**  $^{13}\text{C}$  NMR spectrum of lineariifolianoid A (**1**) recorded at 100 MHz in  $\text{CDCl}_3$ .

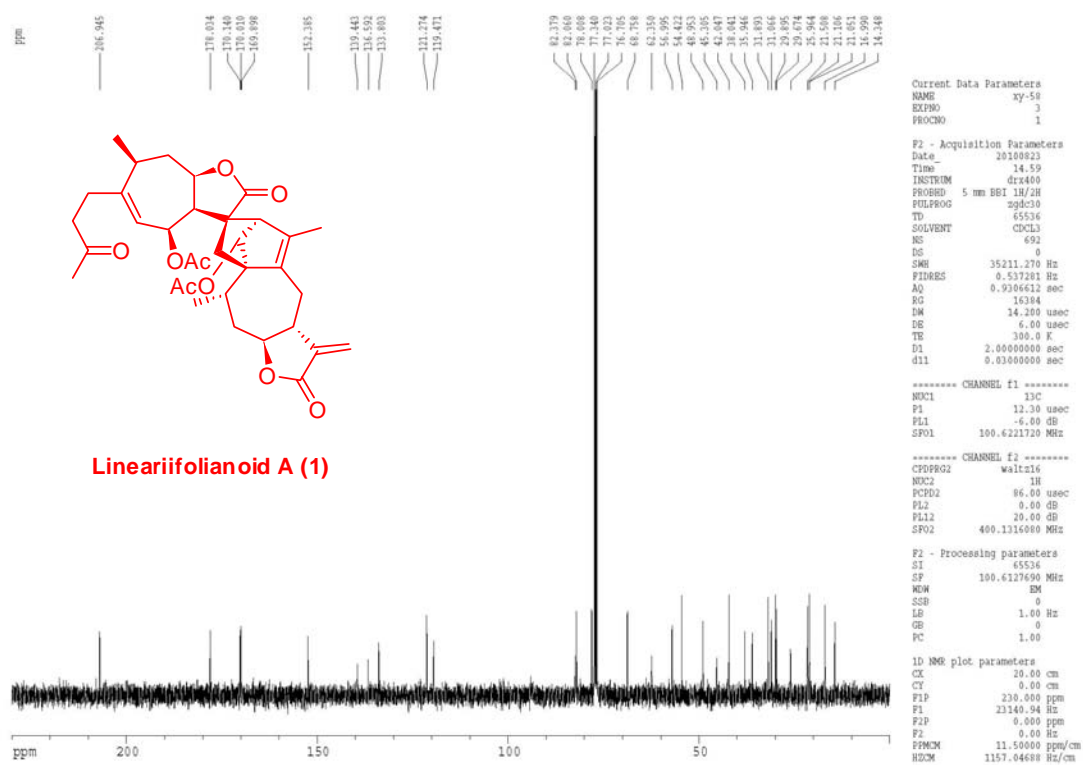

**Fig. S9** DEPT NMR spectrum of lineariifolianoid A (**1**) recorded at 100 MHz in CDCl<sub>3</sub>.

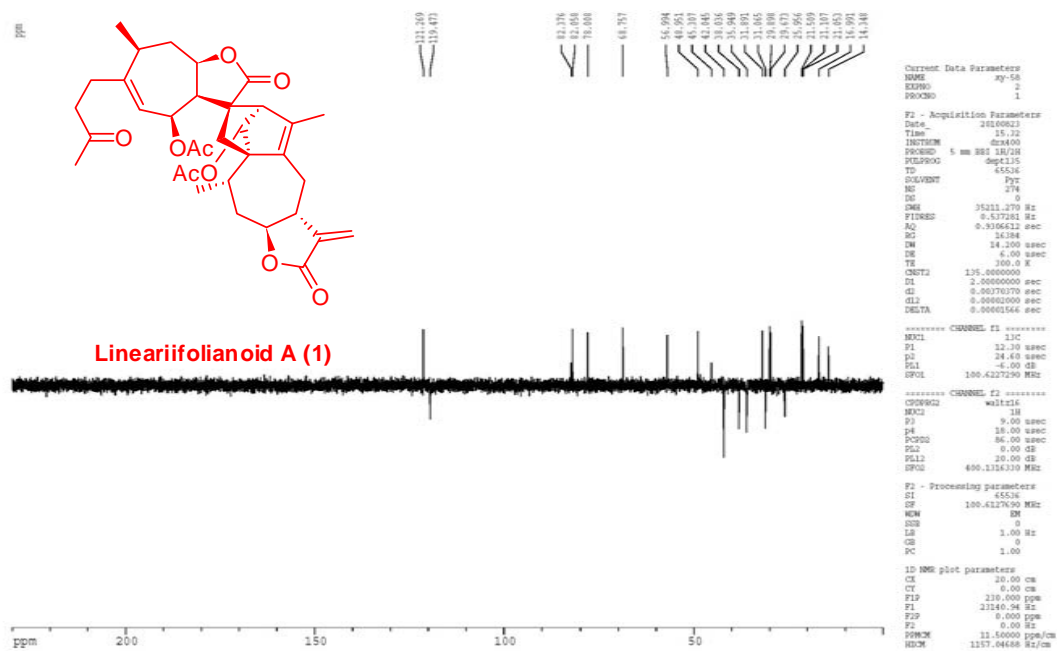

**Fig. S10** HSQC spectrum of lineariifolianoid A (**1**) recorded in CDCl<sub>3</sub>.

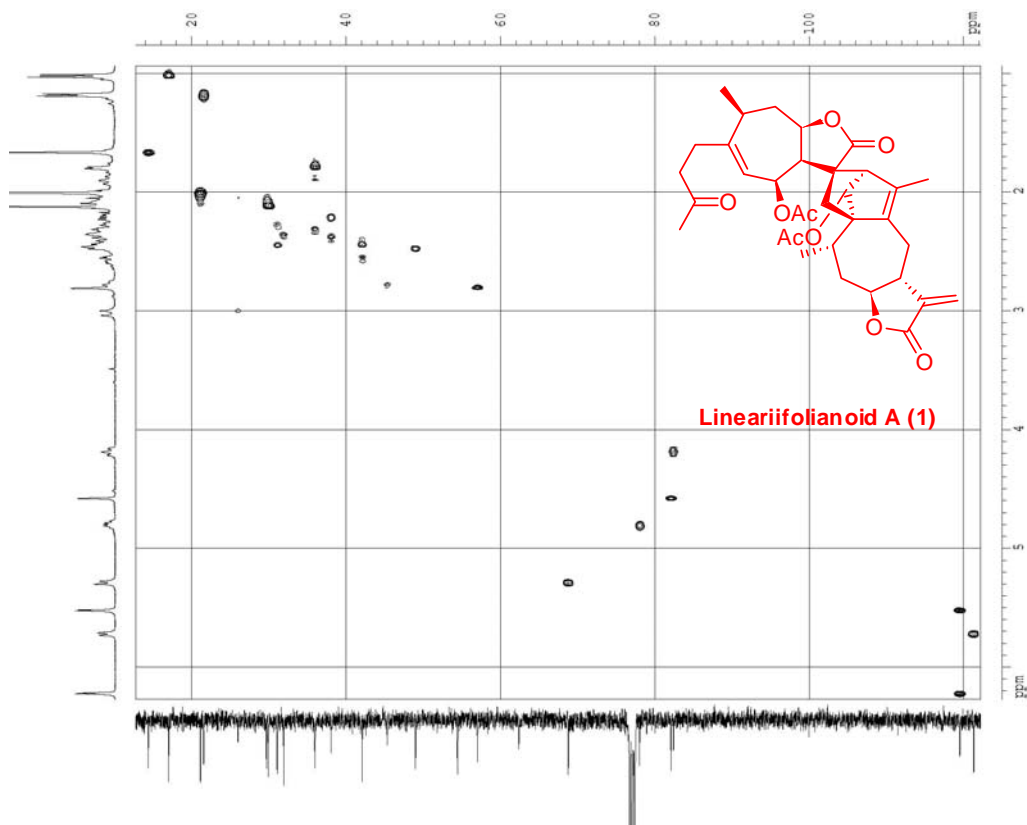

**Fig. S11**  $^1\text{H}$ - $^1\text{H}$  COSY spectrum of lineariifolianoid A (**1**) recorded in  $\text{CDCl}_3$ .

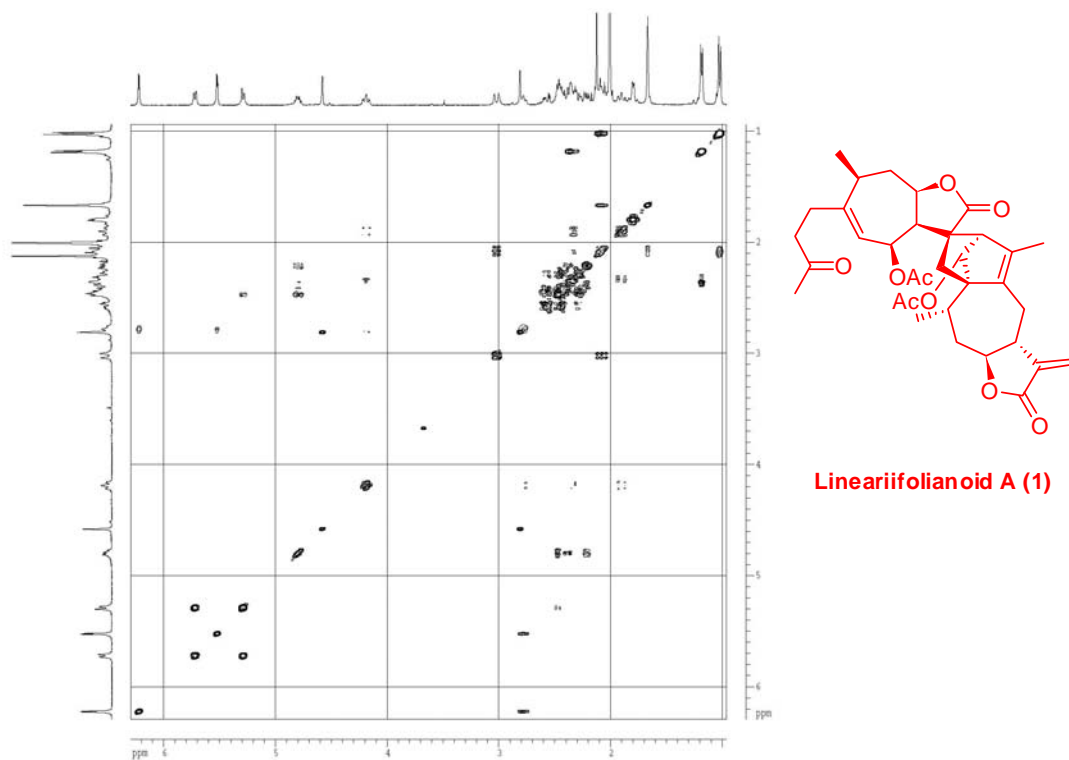

**Fig. S12** HMBC spectrum of lineariifolianoid A (**1**) recorded in  $\text{CDCl}_3$ .

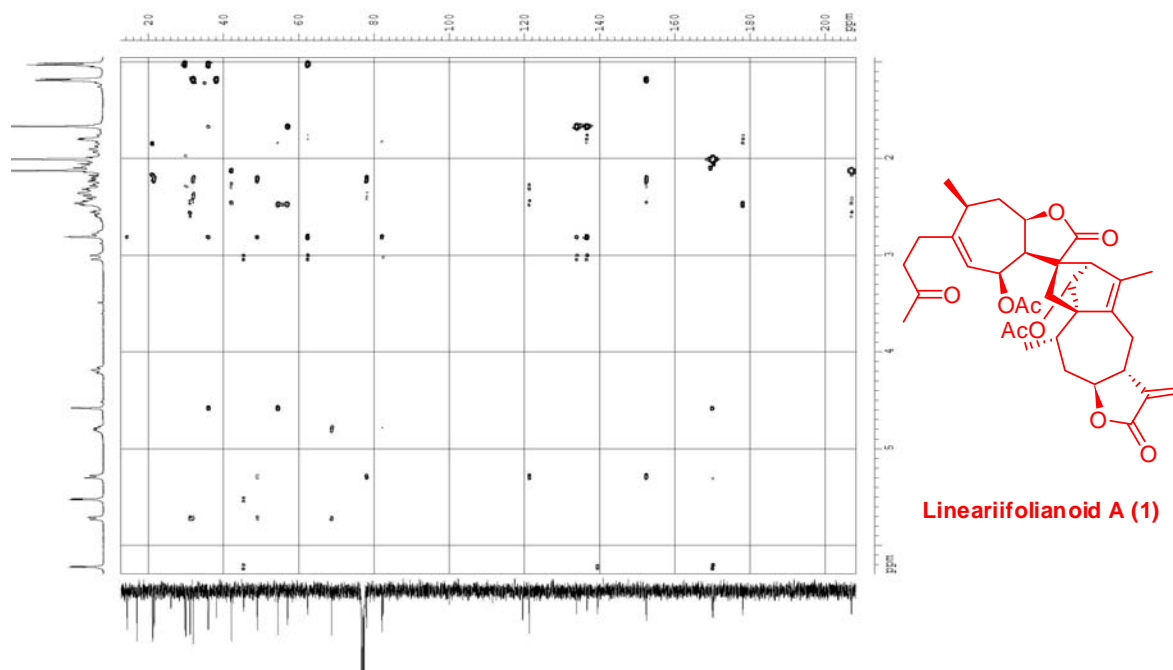

**Fig. S13** NOESY spectrum of linearifolianoid A (**1**) recorded in CDCl<sub>3</sub>.

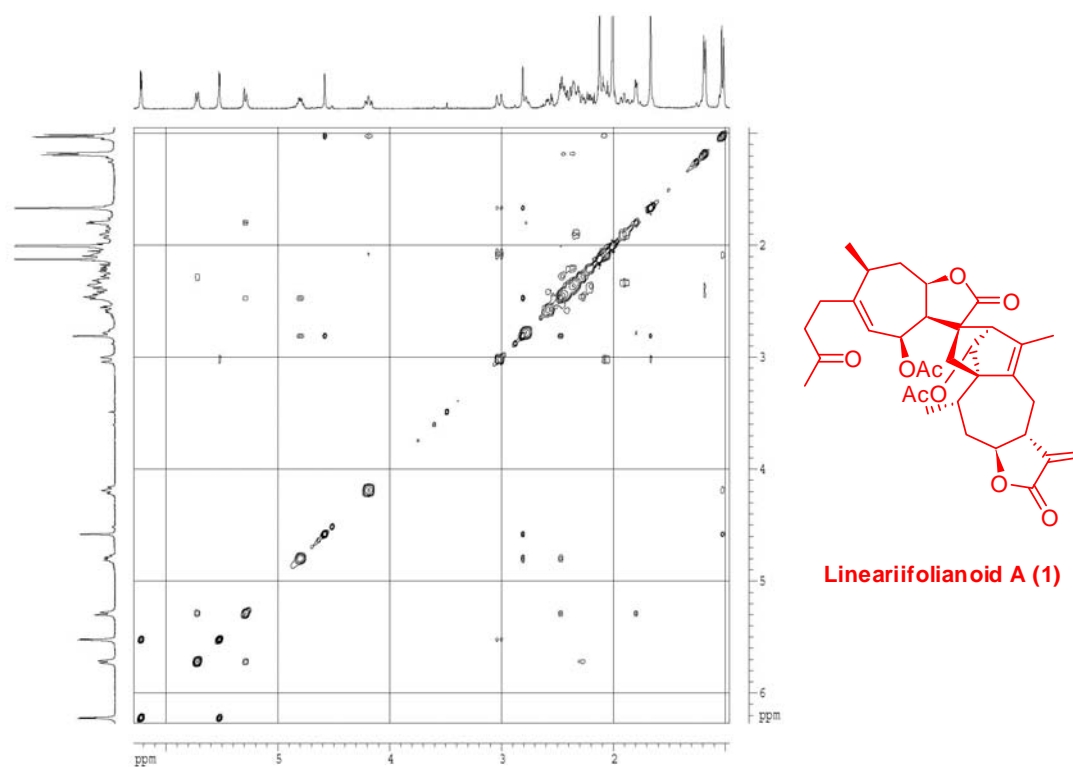

**Fig. S14** <sup>1</sup>H NMR spectrum of linearifolianoid B (**2**) recorded at 400 MHz in CDCl<sub>3</sub>.

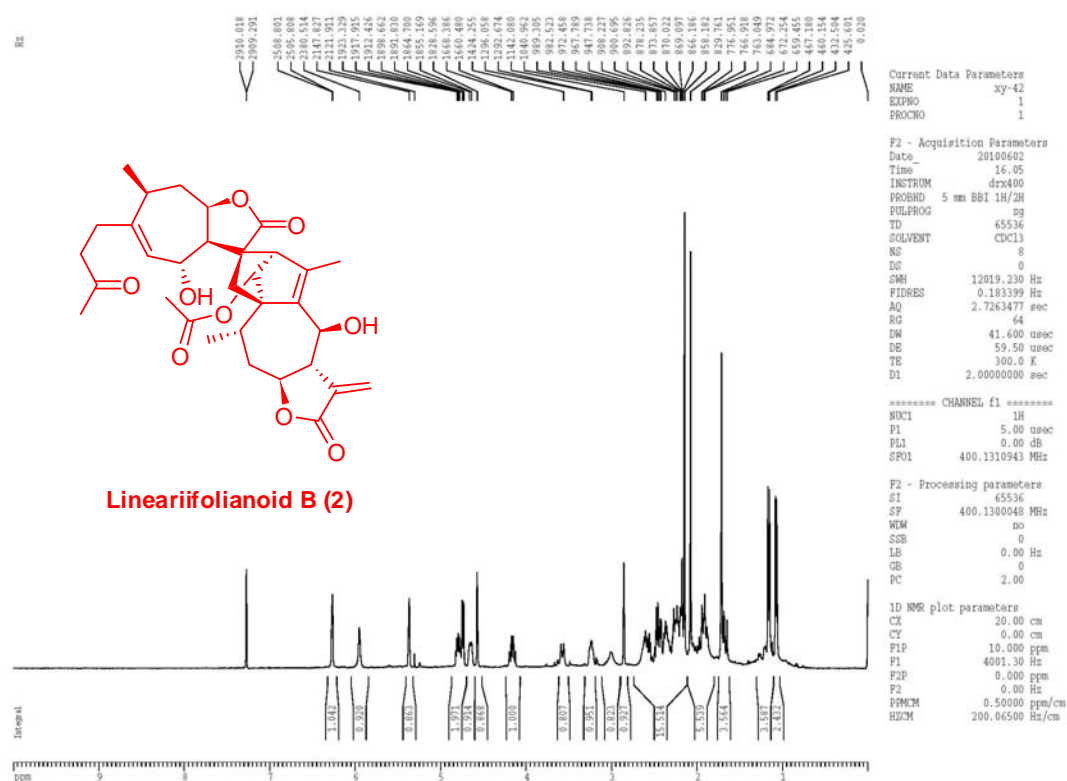



**Fig. S15**  $^{13}\text{C}$  NMR spectrum of linearifolianoid B (**2**) recorded at 400 MHz in  $\text{CDCl}_3$ .

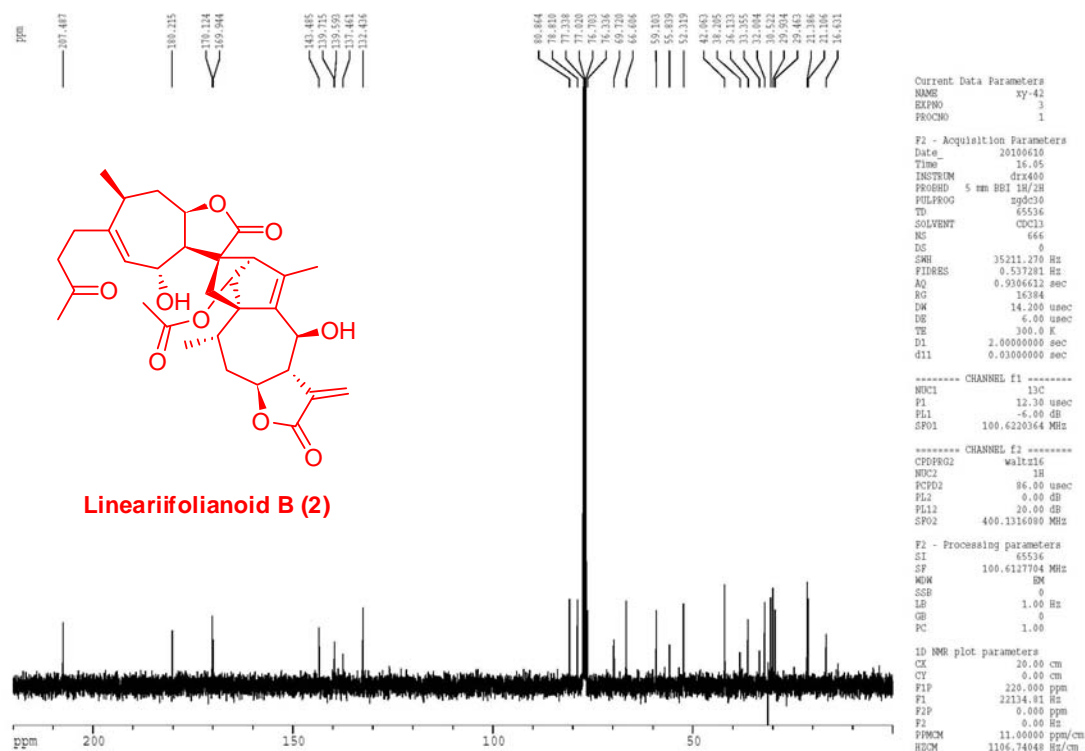

**Fig. S16** DEPT NMR spectrum of linearifolianoid B (**2**) recorded at 400 MHz in  $\text{CDCl}_3$ .

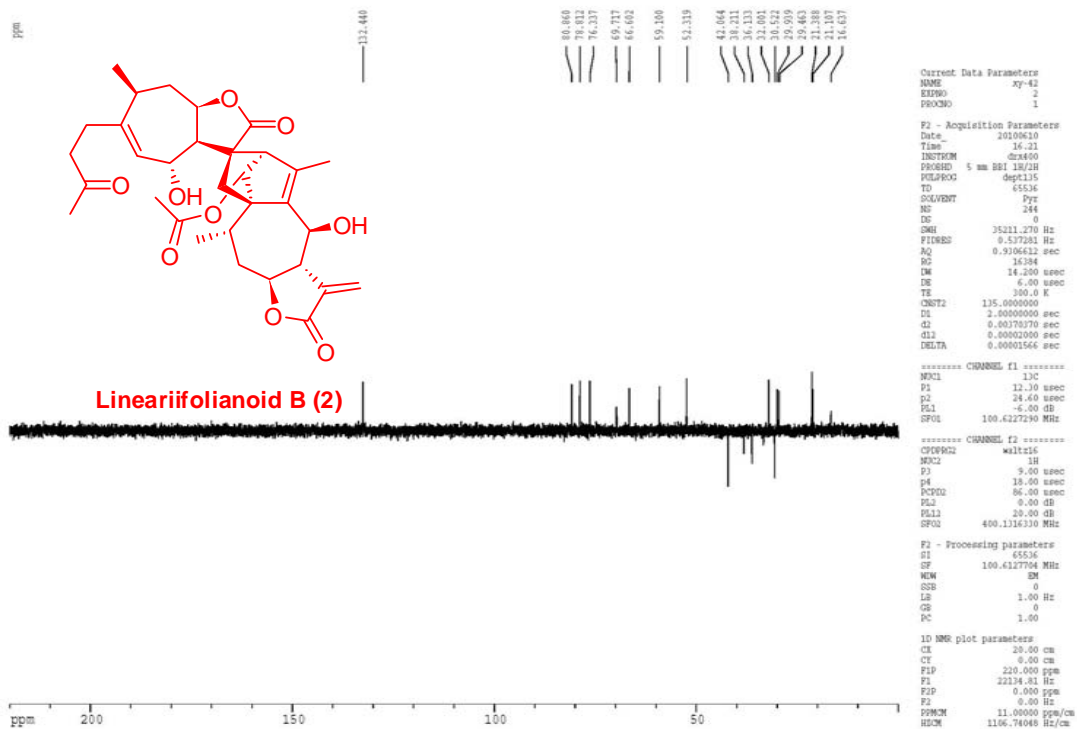

**Fig. S17** HSQC spectrum of lineariifolianoid B (**2**) recorded in CDCl<sub>3</sub>.

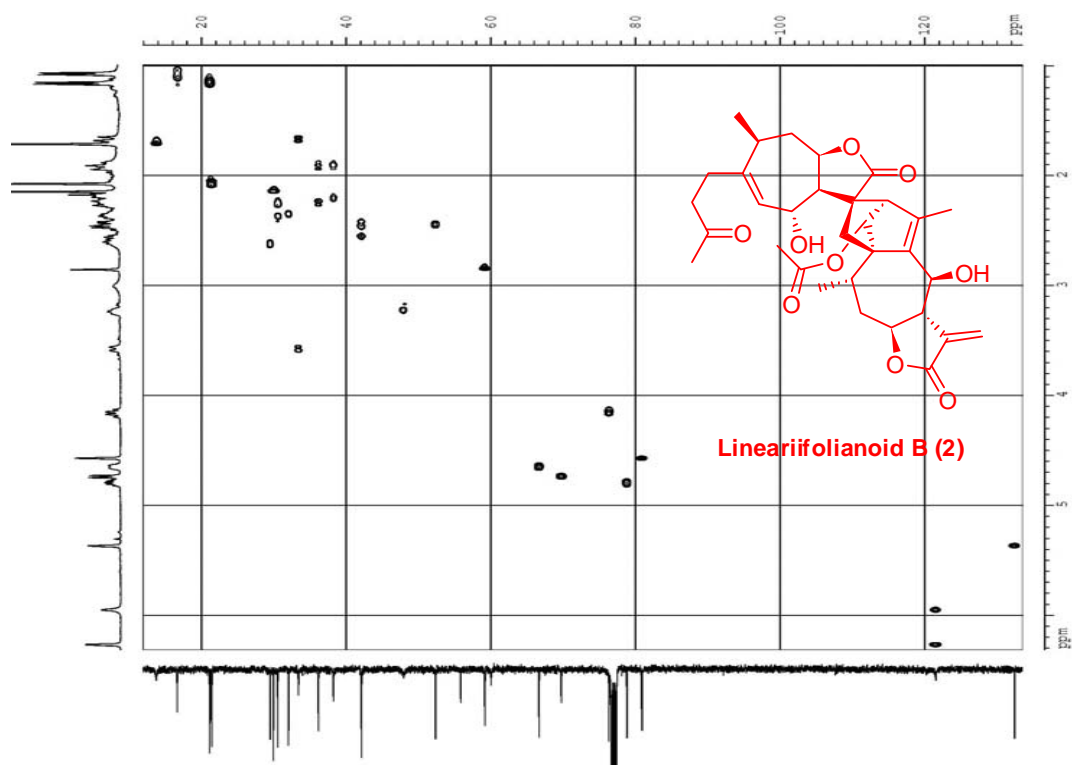

**Fig. S18** <sup>1</sup>H-<sup>1</sup>H COSY spectrum of lineariifolianoid B (**2**) recorded in CDCl<sub>3</sub>.

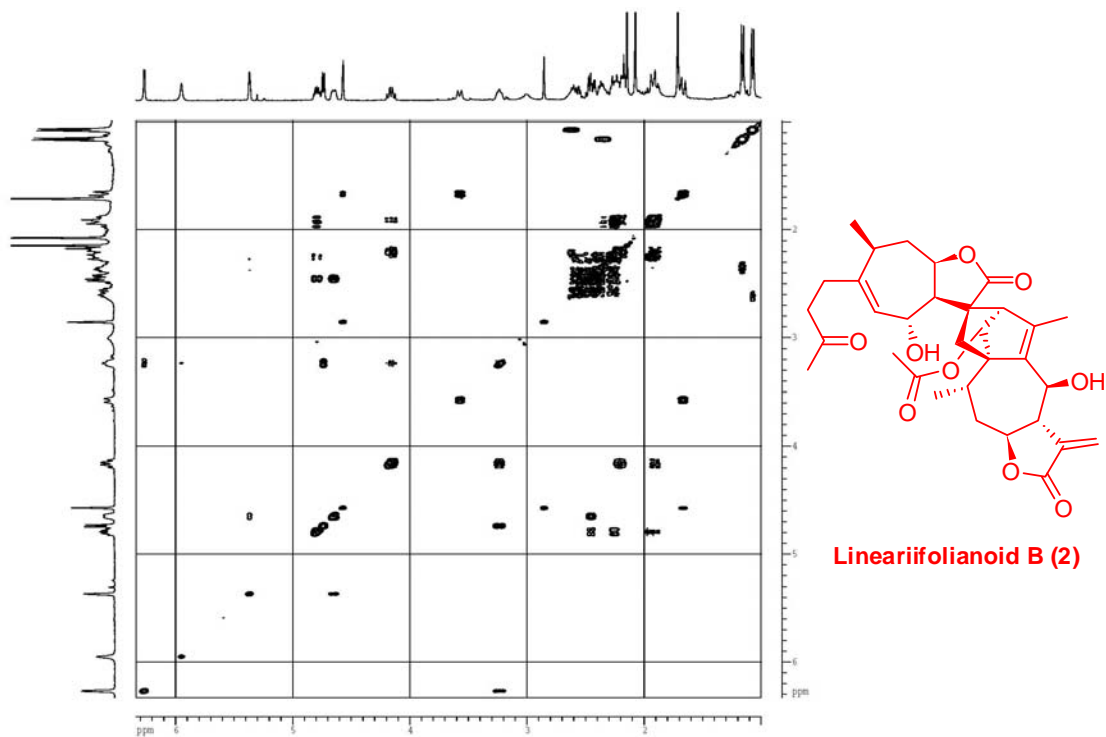

**Fig. S19** HMBC spectrum of linearifolianoid B (**2**) recorded in CDCl<sub>3</sub>.

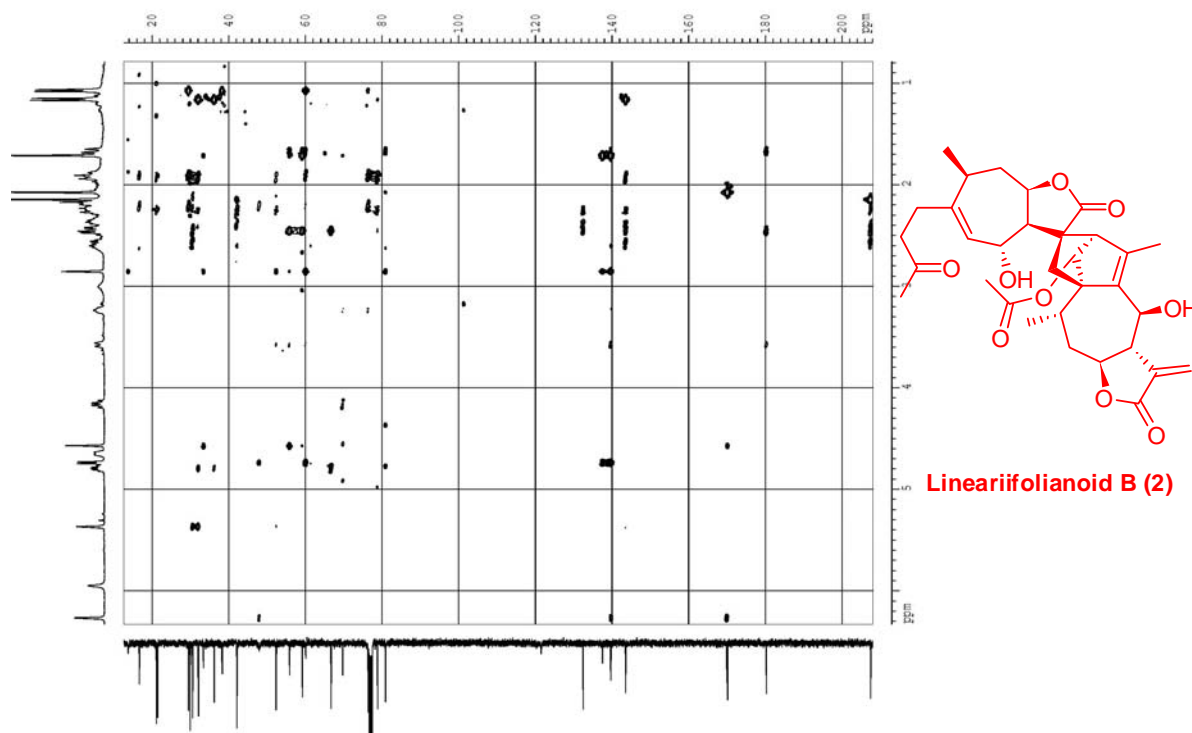

**Fig. S20** NOESY spectrum of linearifolianoid B (**2**) recorded in CDCl<sub>3</sub>.

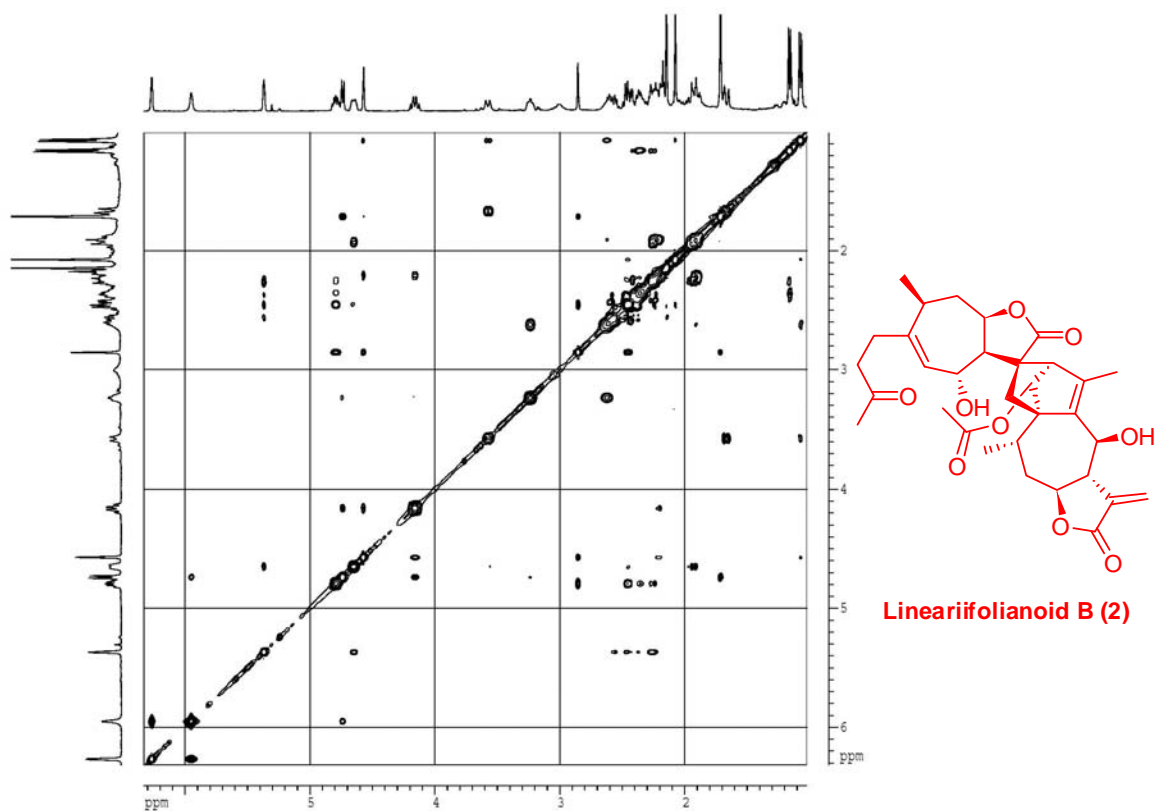

Fig. S21 <sup>1</sup>H NMR spectrum of linearifolianoid C (**3**) recorded at 400 MHz in CDCl<sub>3</sub>.

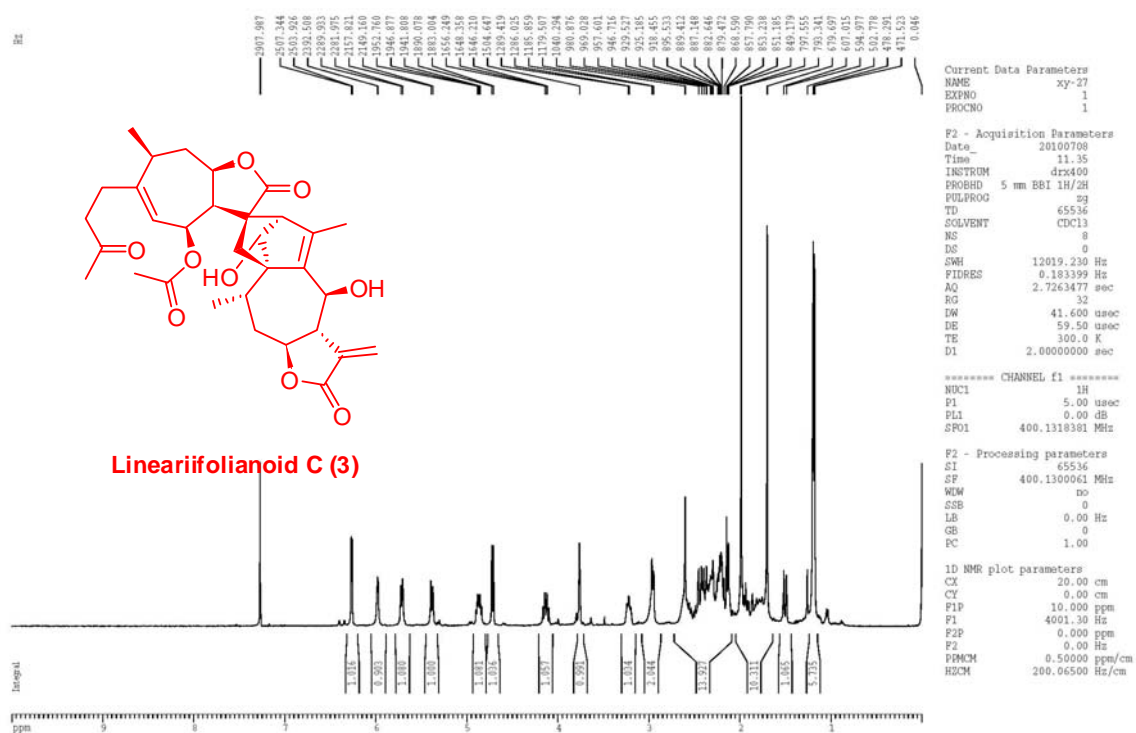

Fig. S22 <sup>13</sup>C NMR spectrum of linearifolianoid C (**3**) recorded at 400 MHz in CDCl<sub>3</sub>.

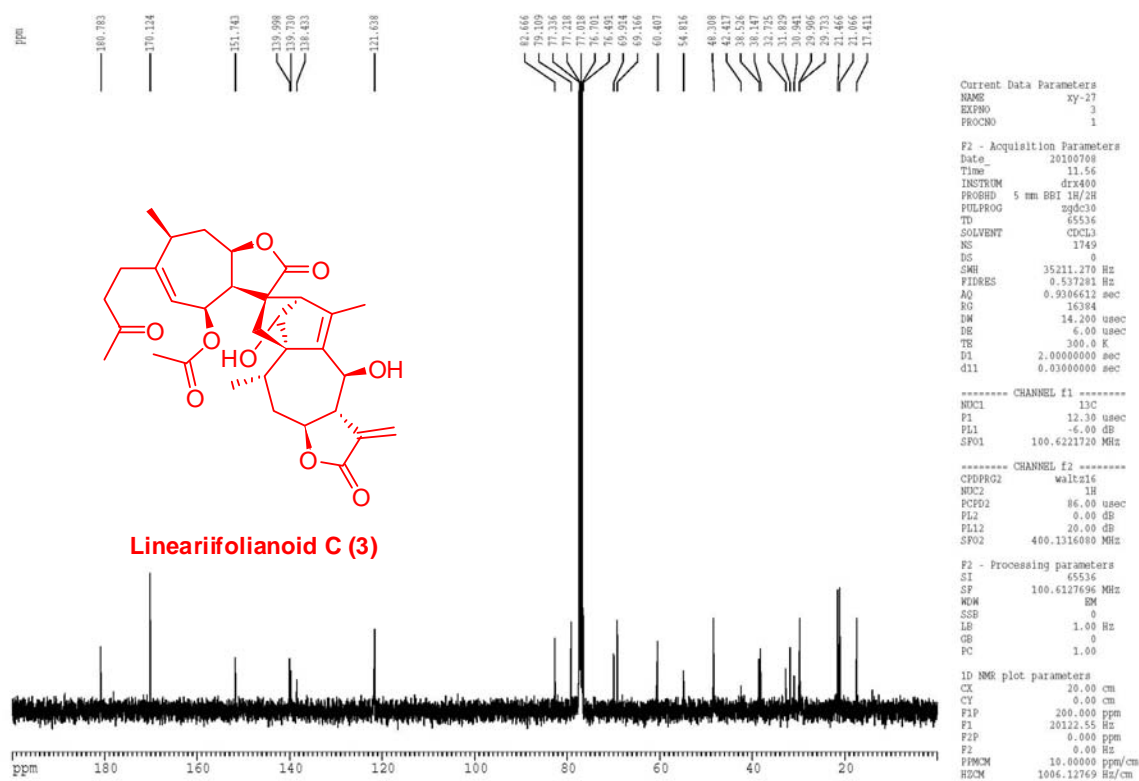

**Fig. S23** DEPT NMR spectrum of lineariifolianoid C (**3**) recorded at 400 MHz in CDCl<sub>3</sub>.

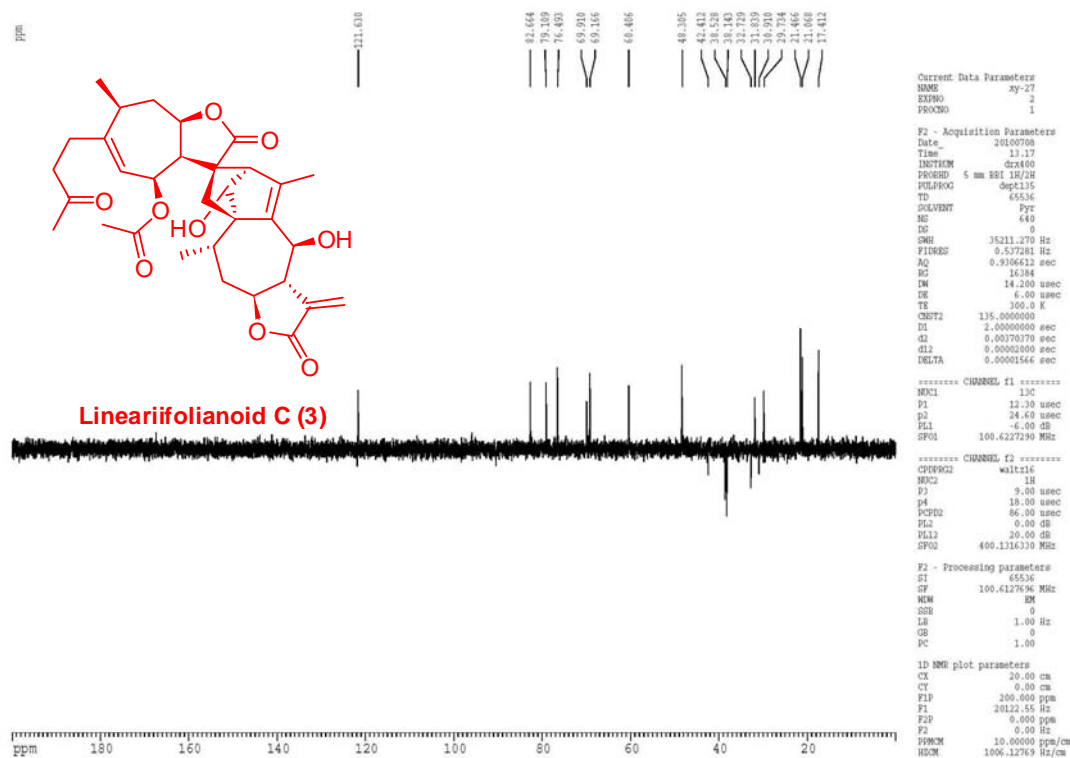

**Fig. S24** HSQC spectrum of lineariifolianoid C (**3**) recorded in CDCl<sub>3</sub>.

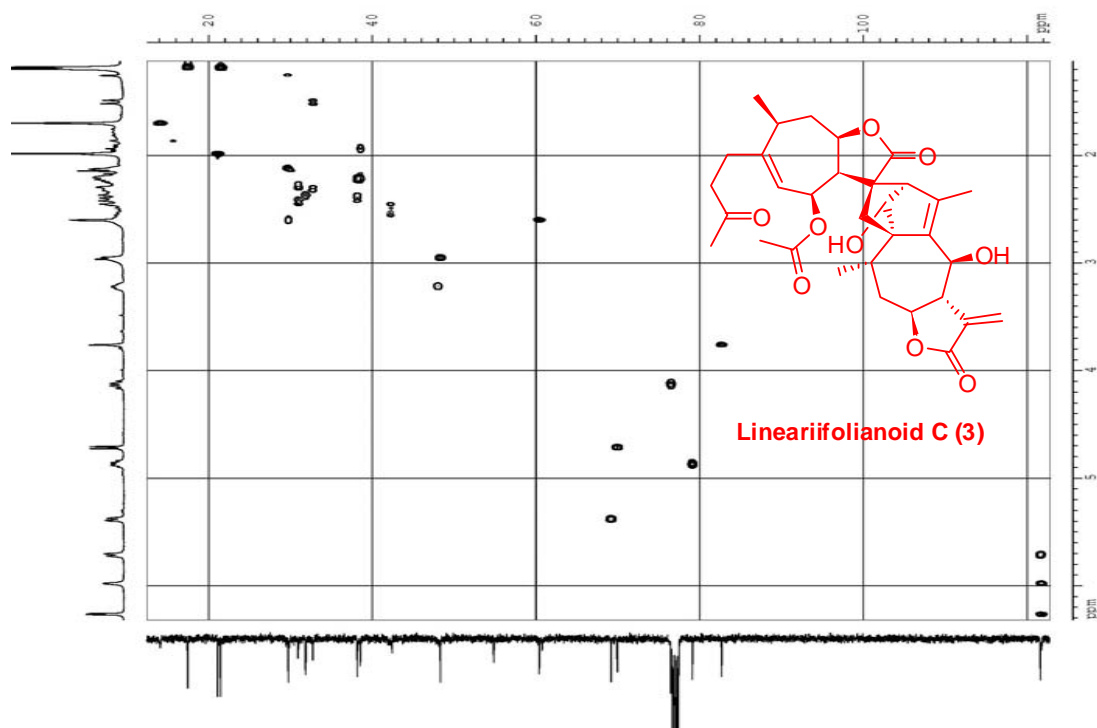

**Fig. S25**  $^1\text{H}$ - $^1\text{H}$  COSY spectrum of lineariifolianoid C (**3**) recorded in  $\text{CDCl}_3$ .

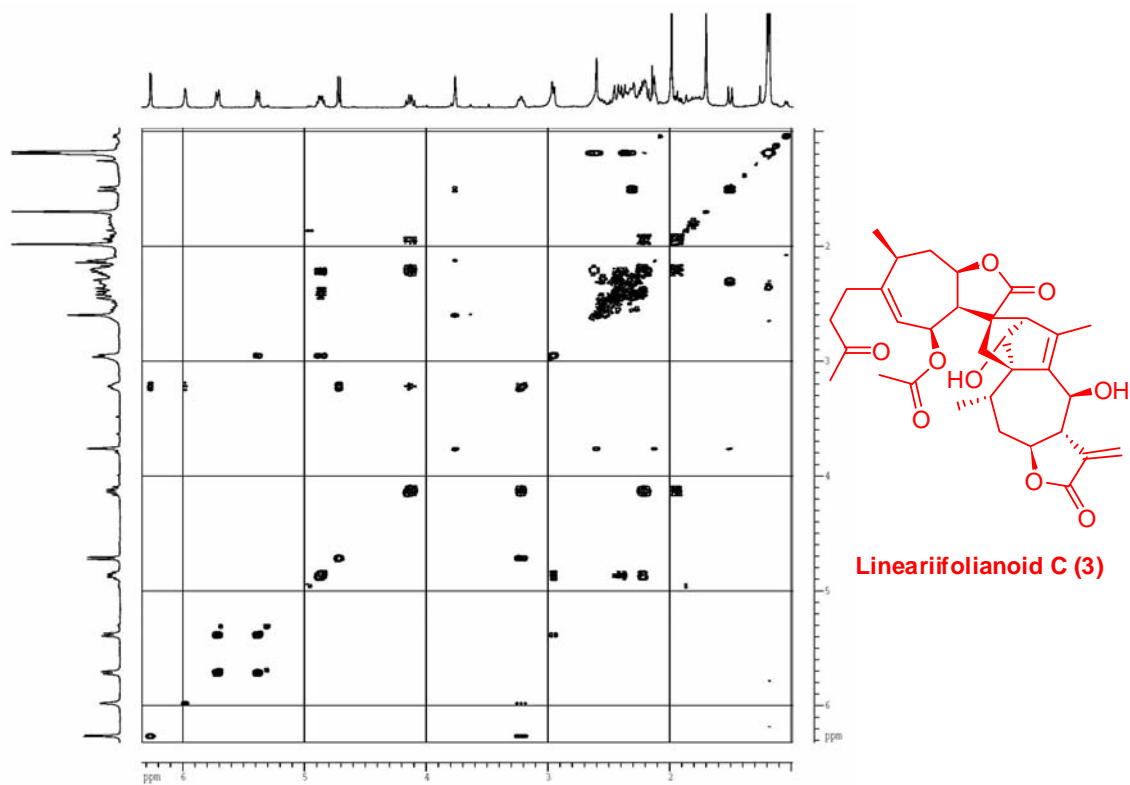

**Fig. S26** HMBC spectrum of lineariifolianoid C (**3**) recorded in  $\text{CDCl}_3$ .

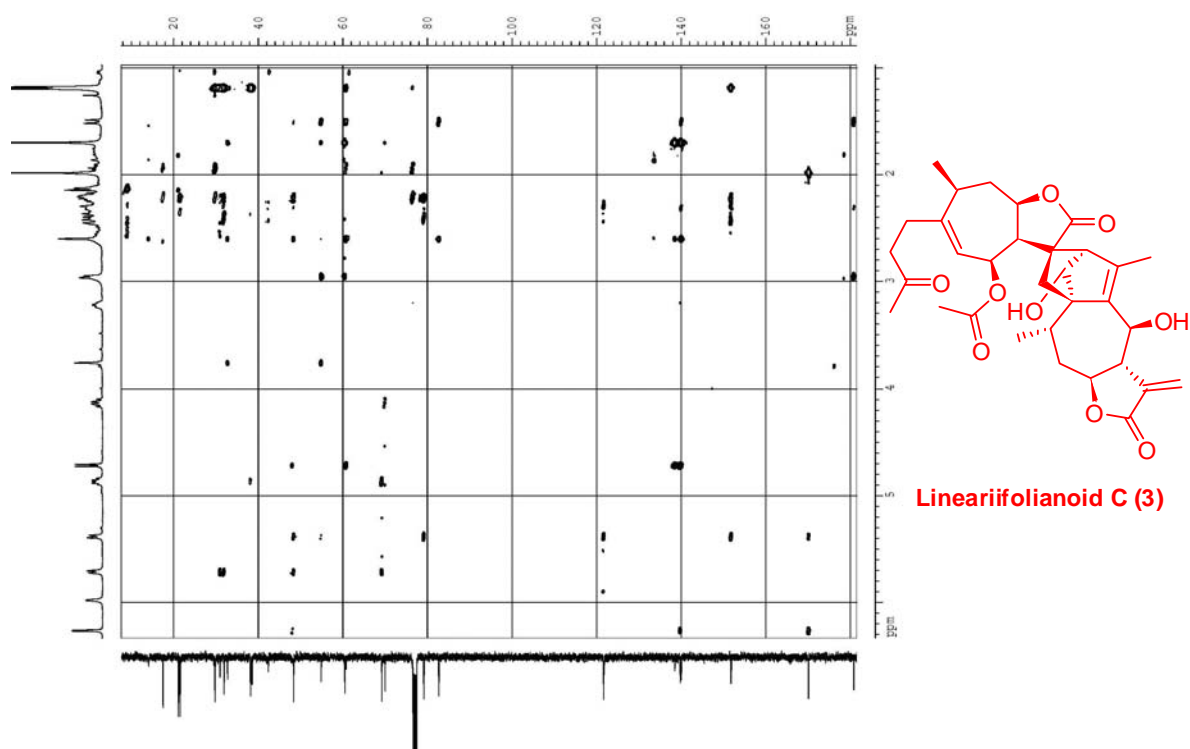

**Fig. S27** NOESY spectrum of linearifolianoid C (3) recorded in CDCl<sub>3</sub>.

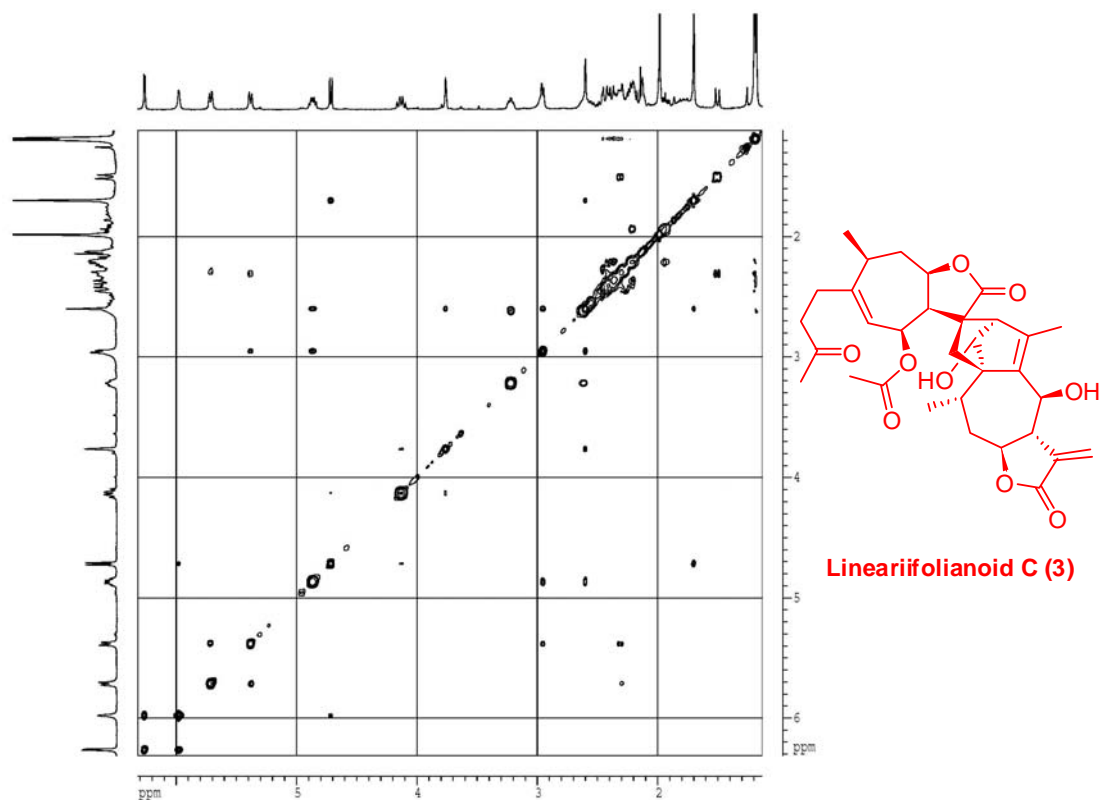

**Fig. S28** <sup>1</sup>H NMR spectrum of linearifolianoid D (4) recorded at 400 MHz in CDCl<sub>3</sub>.

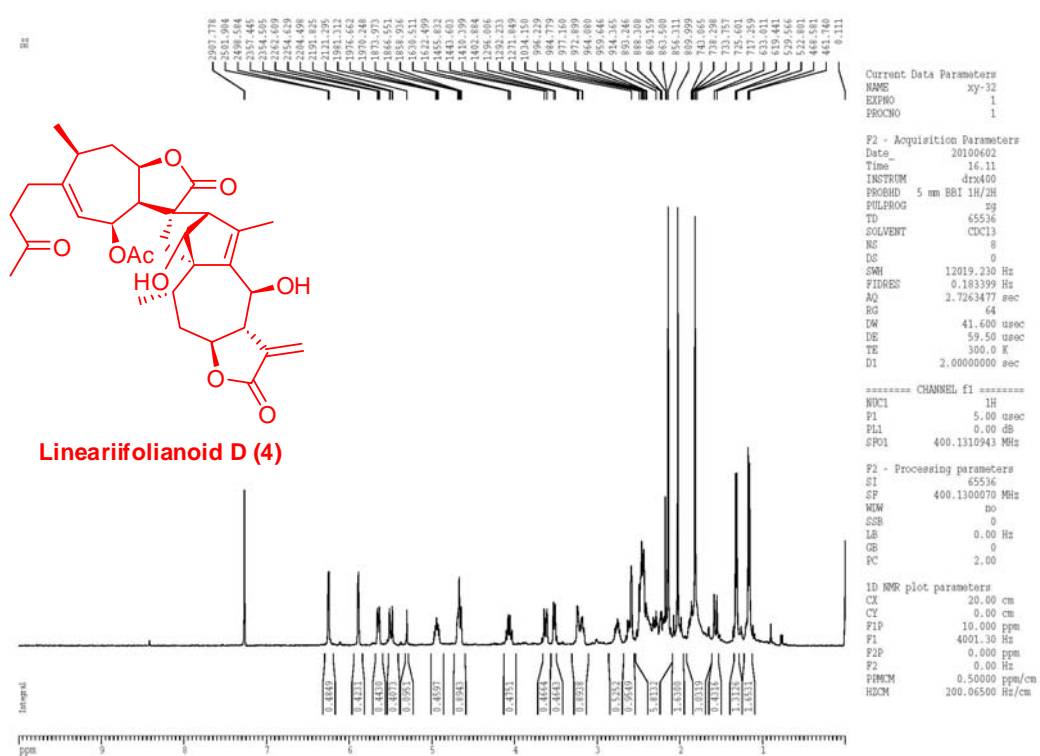

**Fig. S29**  $^{13}\text{C}$  NMR spectrum of linearifolianoid D (**4**) recorded at 400 MHz in  $\text{CDCl}_3$ .

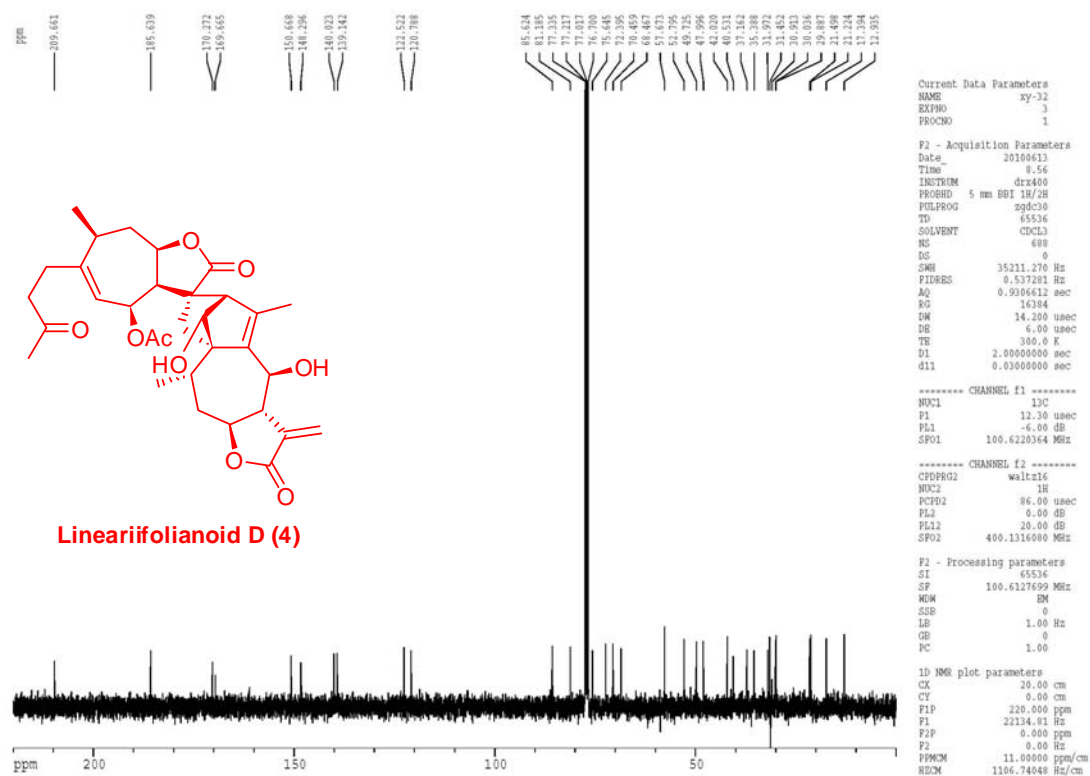

**Fig. S30** DEPT NMR spectrum of linearifolianoid D (**4**) recorded at 400 MHz in  $\text{CDCl}_3$ .

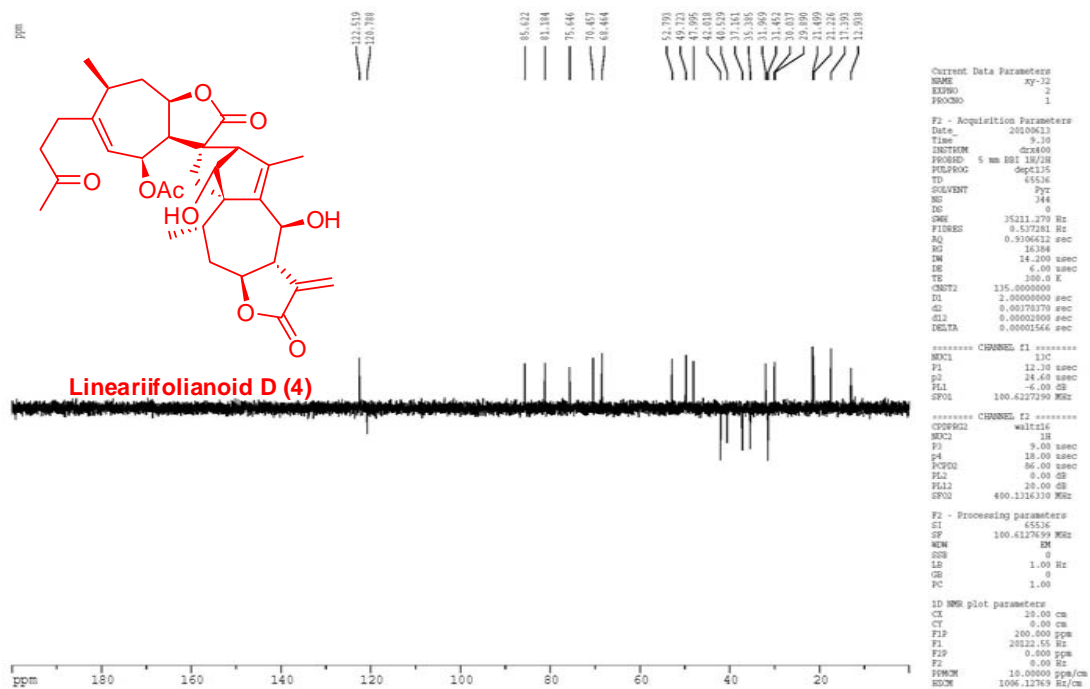



**Fig. S31** HSQC spectrum of lineariifolianoid D (**4**) recorded in  $\text{CDCl}_3$ .

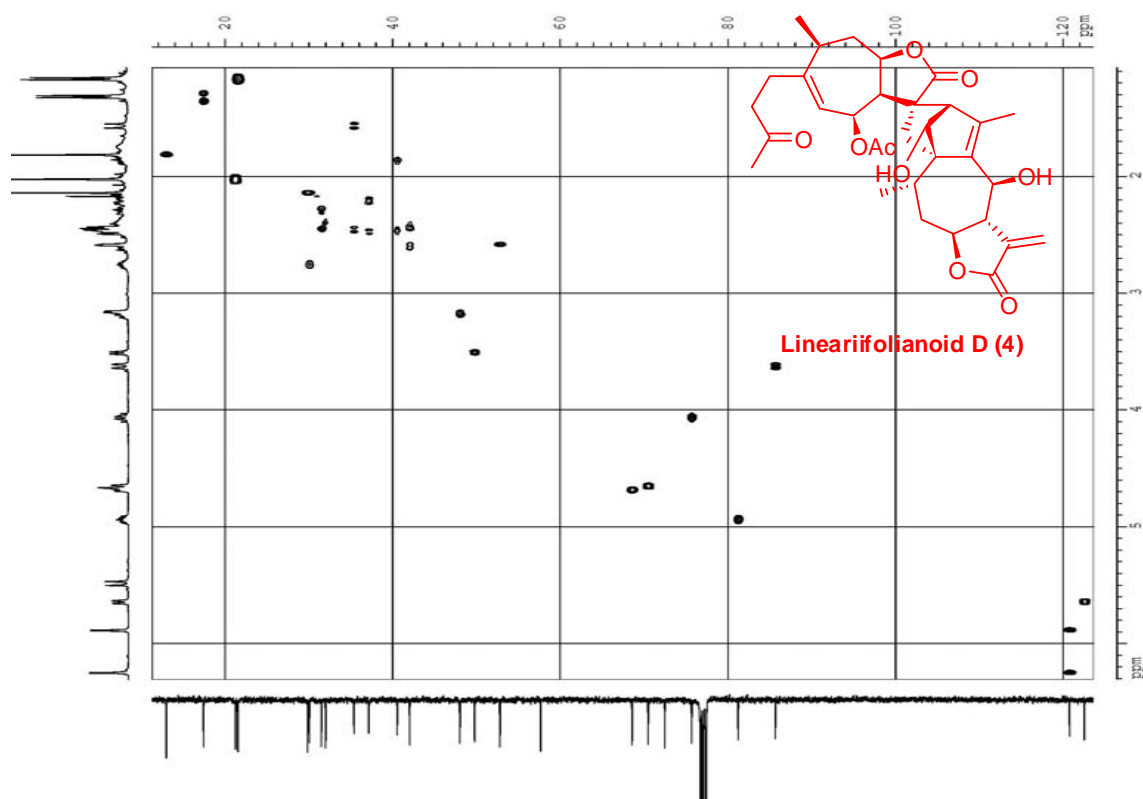

**Figure S32.**  $^1\text{H}$ - $^1\text{H}$  COSY spectrum of lineariifolianoid D (**4**) recorded in  $\text{CDCl}_3$ .

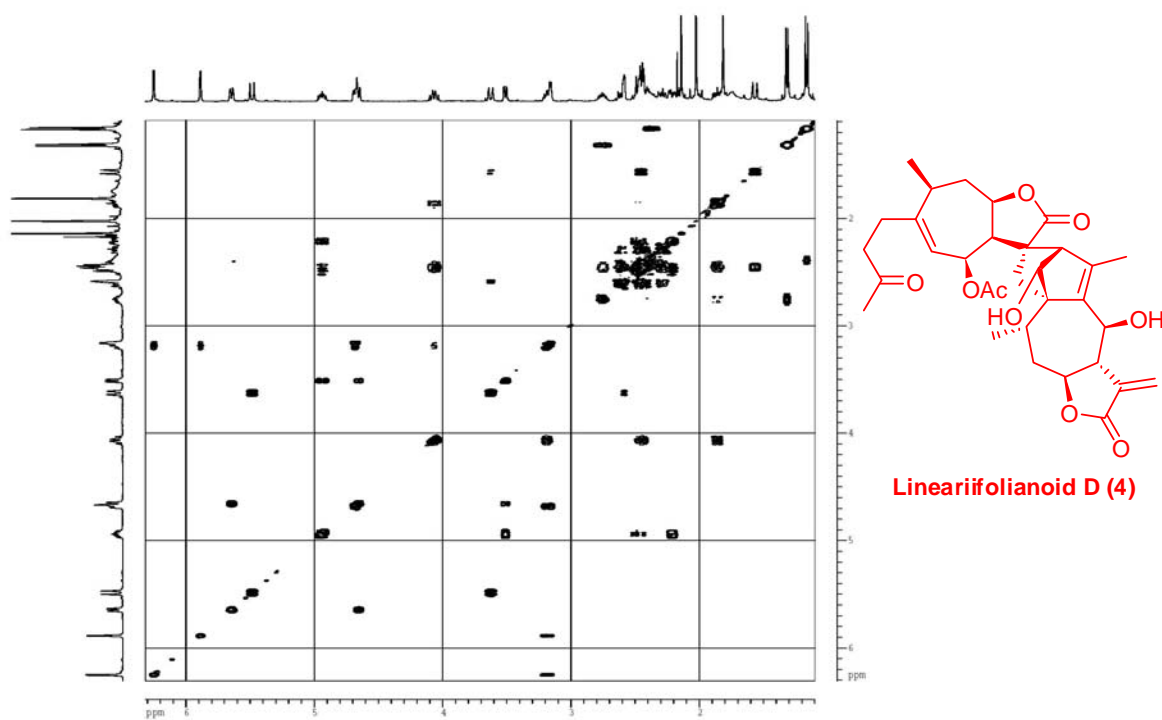

**Fig. S33** HMBC spectrum of lineariifolianoid D (**4**) recorded in CDCl<sub>3</sub>.

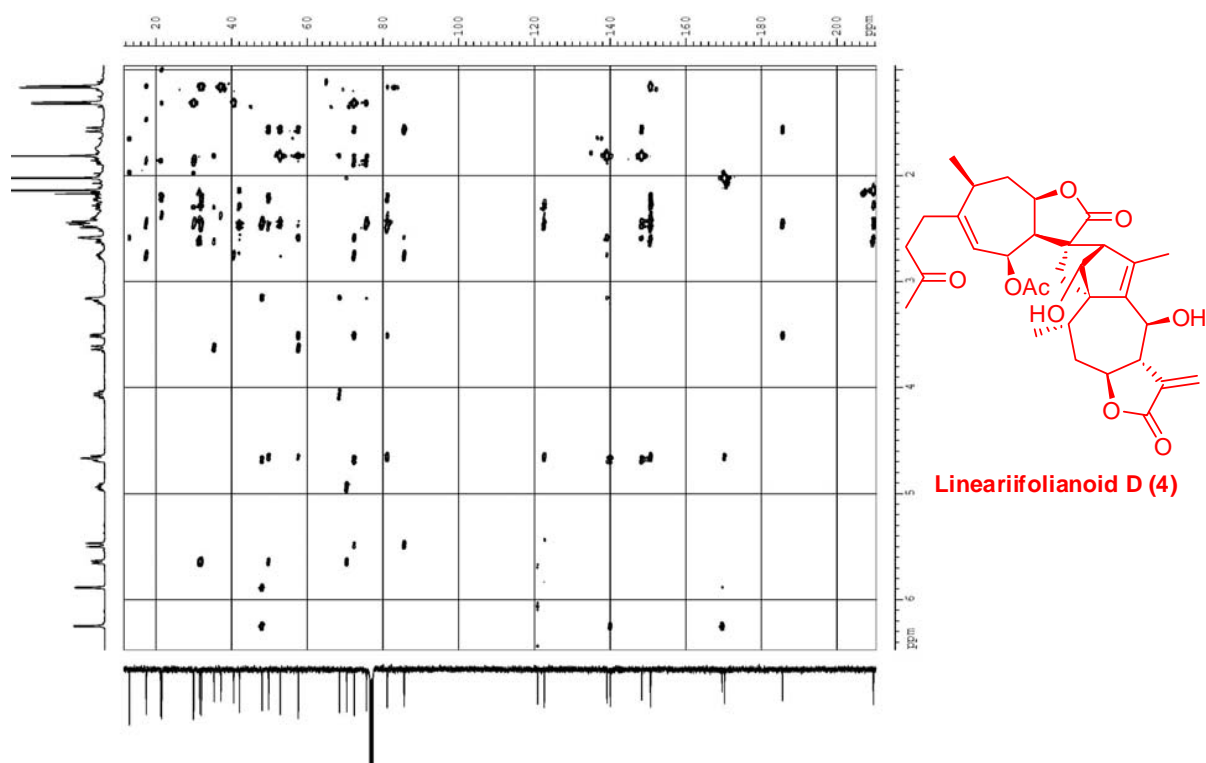

**Fig. S34** NOESY spectrum of lineariifolianoid D (**4**) recorded in CDCl<sub>3</sub>.

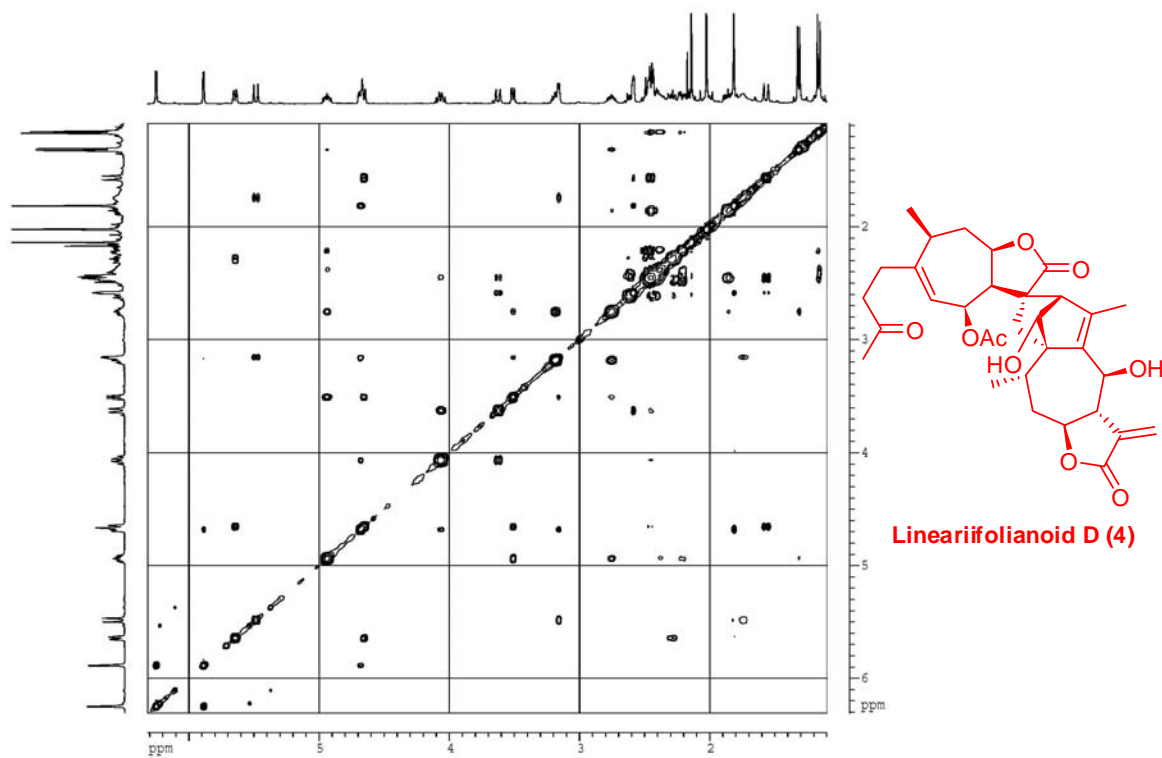

Supplement: c2ra01014c.pdf [file c2ra01014c.pdf]
